# Supplementary material for: Extensive androgen receptor enhancer heterogeneity in primary prostate cancers underlies transcriptional diversity and metastatic potential
Source: PubMed Central journal article supplement (PMC9712620; doi:10.1038/s41467-022-35135-2), 2022-11-30
Supplement: 41467_2022_35135_MOESM1_ESM.pdf [file 41467_2022_35135_MOESM1_ESM.pdf]

## Supplementary Information

# Supplementary Figure 1

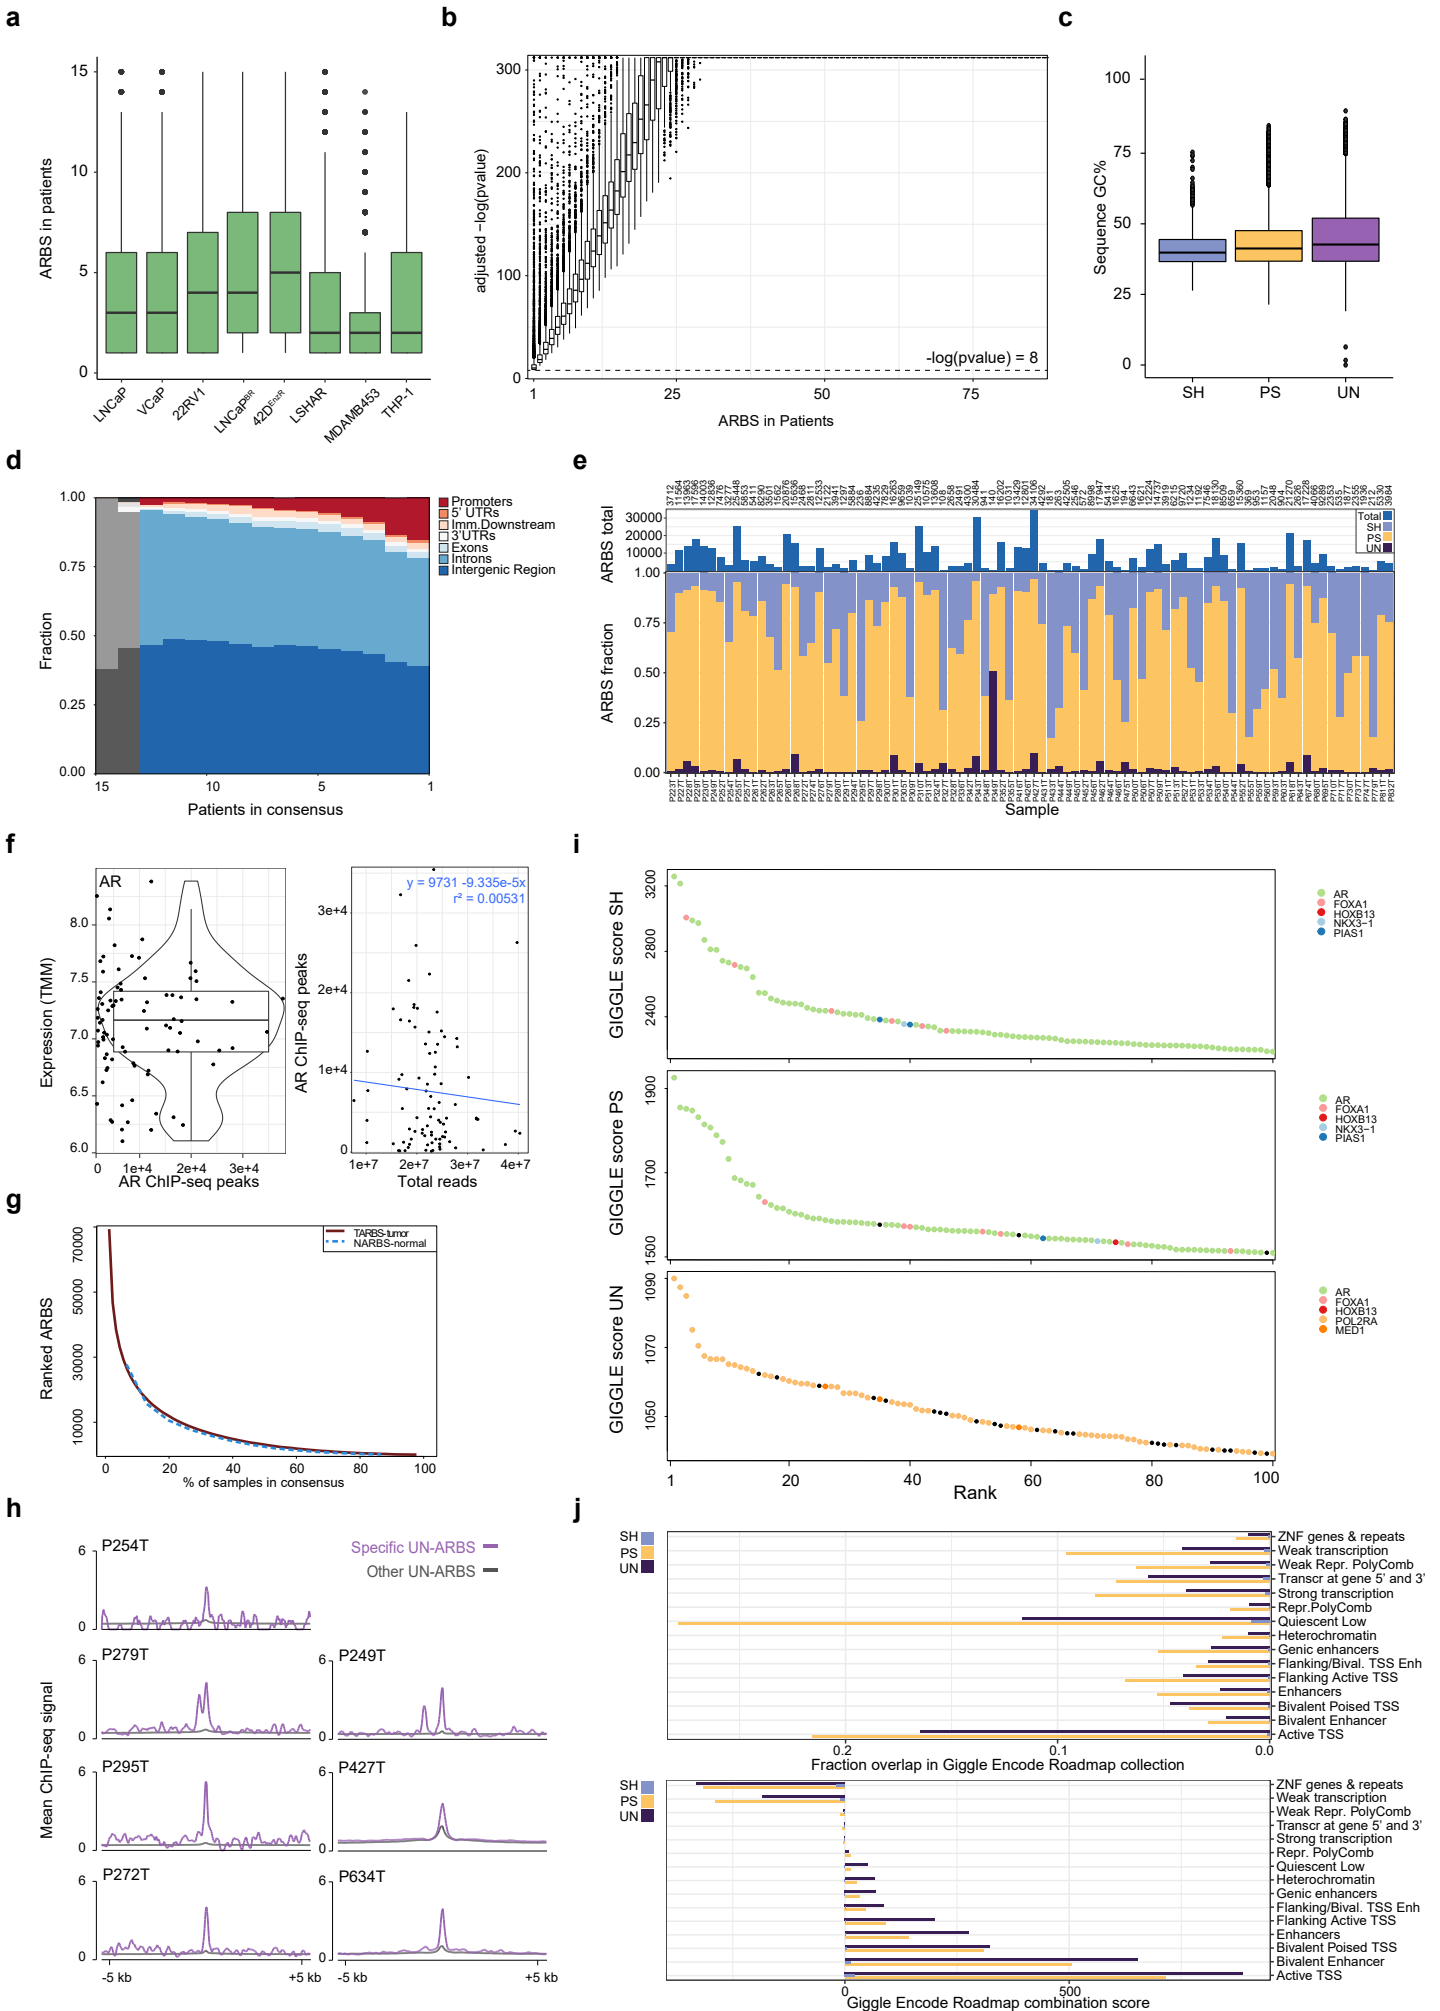

## **Supplementary Figure 1: Normal ranked ARBS distribution and consensus, QC, MSPC and GIGGLE analysis**

(a) Boxplot quantification of normal tissue ranked ARBS (n=27,500) presence in cell lines. Center line, median; upper and lower quartiles; whiskers, 1.5X interquartile range; points, outliers.

(b) Benjamini-Hochberg adjusted  $-\log(p\text{-value})$  distributions for ranked ARBS from two-tailed Fisher's exact test by MSPC, with UN-ARBS minimum  $-\log(p\text{-value})$  of 8. Center line, median; upper and lower quartiles; whiskers, 1.5X interquartile range; points, outliers. Exact values reported in Source Data.

(c) Sequence nucleotide GC% for SH-ARBS, PS-ARBS and UN-ARBS. Center line, median; upper and lower quartiles; whiskers, 1.5X interquartile range; points, outliers.

(d) Annotated genomic consensus for normal ranked ARBS (n=27,500 from n=15 patients). Gray: instable consensus due to small number of ARBS.

(e) Graphical overview of ARBS total and distribution of ARBS categories (SH, PS and UN) per sample, numbers on top indicate number of peaks.

(f) ARBS ranking normalized for number of samples, comparing TARBS found in primary tumors (dark-red) and NARBS found in normal epithelium (blue dashes).

(g) Genome-wide average AR ChIP-seq intensities for tumor-specific UN-ARBS (purple) and UN-ARBS identified in all other primary tumors (87).

(h) Transcription Factor GIGGLE score plots for SH-ARBS, PS-ARBS and UN-ARBS for canonical PCa interactors. ChIP-seq experiments in the GIGGLE database provide no overlap of UN-ARBS for AR, FOXA1 and HOXB13, but for transcription machinery proteins POL2RA and MED1.

(i) GIGGLE Encode overlap and combination score of genomic locations associated with SH-ARBS, PS-ARBS and UN-ARBS in GIGGLE database.

# Supplementary Figure 2

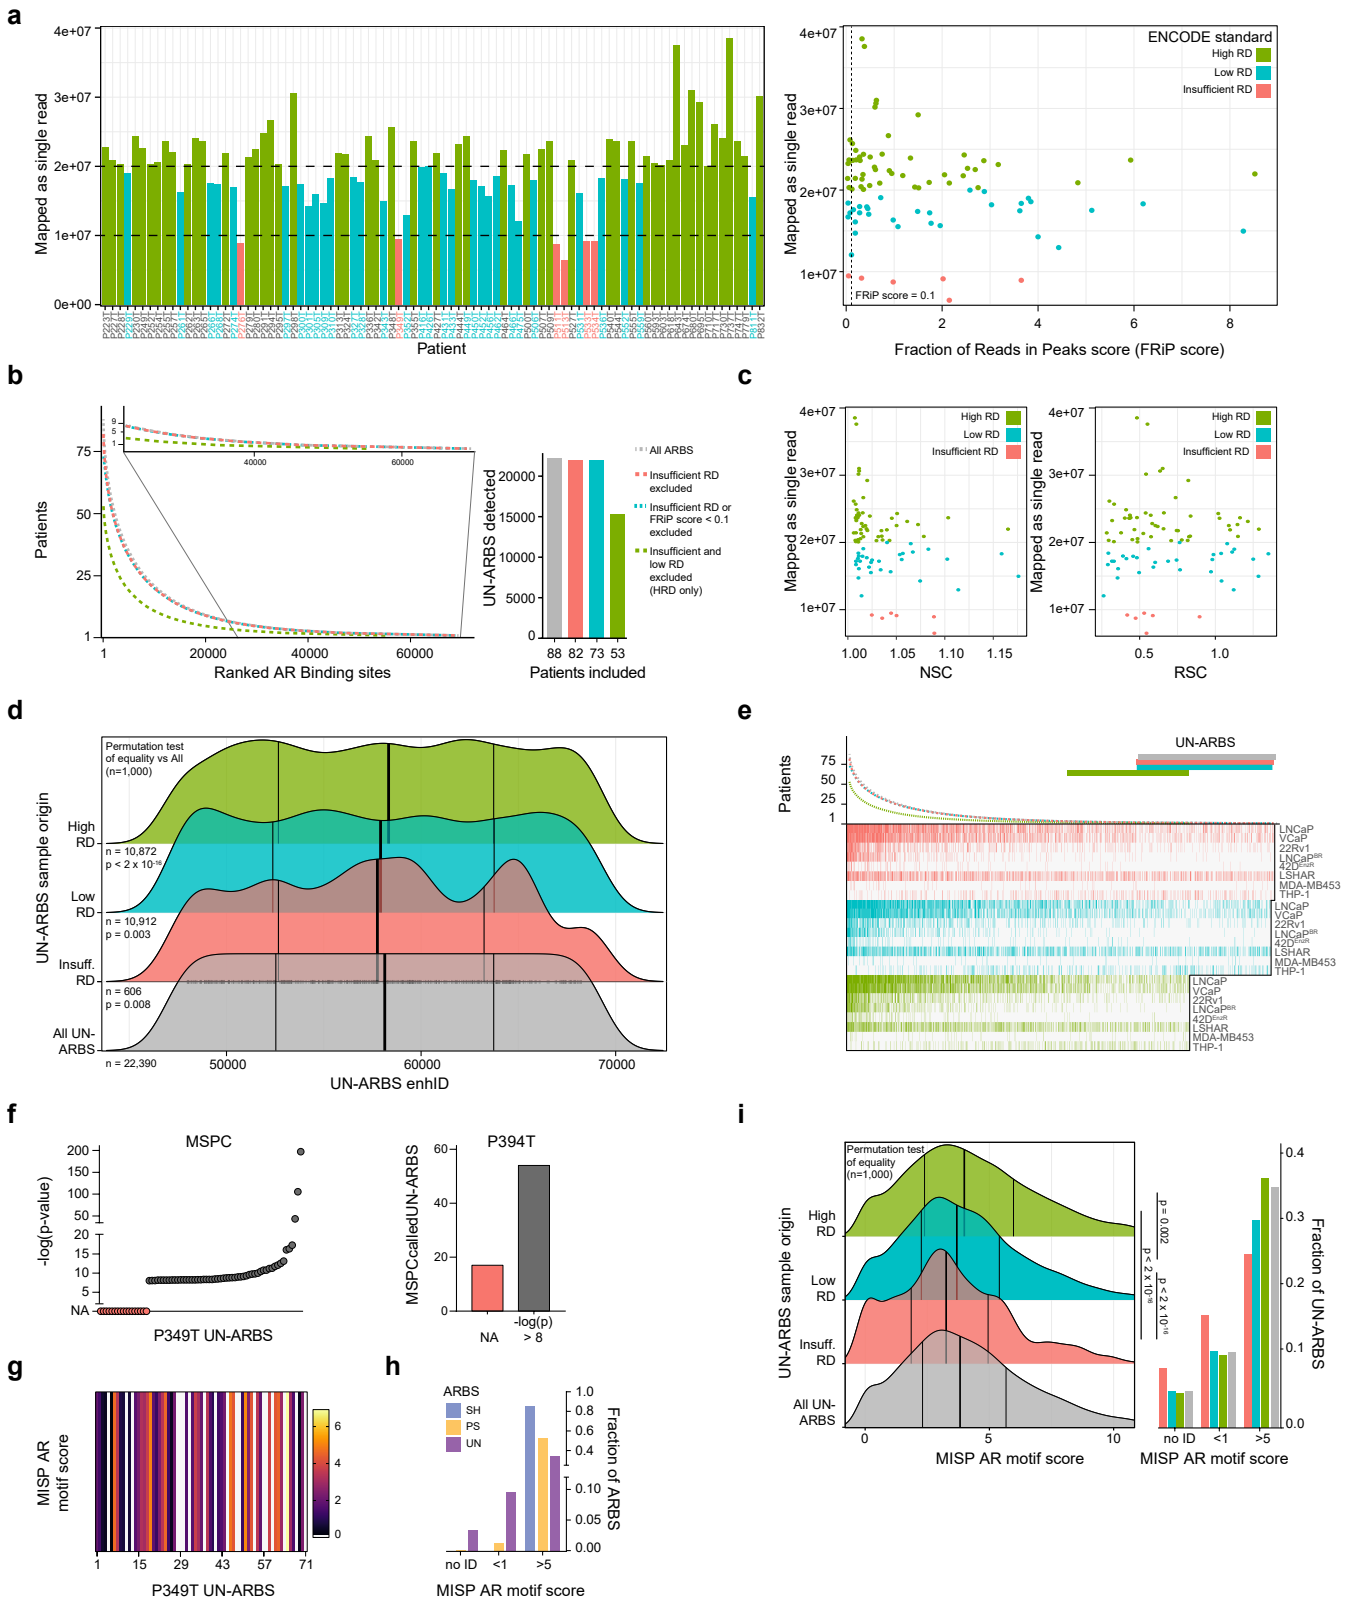



## **Supplementary Figure 2: AR ChIP-seq sample quality does not significantly affect ARBS ranking or UN-ARBS distributions**

(a) Left: Overview of single mapped reads in patient samples, upper dashed line indicates 20 million reads, lower dashed line indicates 10 million reads. Right: single mapped reads plotted against FRiP score, dashed line indicates FriP score of 0.1.

(b) Left: Tumor ranked ARBS presence in patients for different ENCODE4 and FRiP score exclusion criteria for samples; grey = original tumor ranked ARBS, red: samples with insufficient read depth (RD), blue: samples with insufficient RD or FRiP score < 0.1, green: samples with insufficient and low RD excluded. Inset: magnification of the heterogeneous tail of ranked ARBS. Right: Barplot of UN-ARBS detected for each exclusion criterium

(c) Single mapped reads plotted against NSC (left) and RSC (right) for each ENCODE4 RD category.

(d) Density plots of UN-ARBS sample origin grouped for ENCODE4 quality classification; long lines separate quartiles, short lines indicate UN-ARBS presence from insufficient RD samples. p-values were obtained from permutation test assuming equality of distribution (n=1,000).

(e) Presence of ranked ARBS in various cell lines for exclusion criteria. Colored bars above indicate UN-ARBS presence.

(f) Left: Benjamini-Hochberg adjusted  $-\log(p\text{values})$  for UN-ARBS found specifically in outlier sample P394T, NA = insignificant result. Right: Barplot quantification of UN-ARBS MSPC results.

(g) MISP motif score for AR motifs in P394T UN-ARBS. Light grey: no match found (MISP score 0).

(h) Fraction of ARBS identified by MISP AR motif scoring for SH/PS/UN-ARBS grouped on score.

(i) Left: MISP AR motif scores for UN-ARBS grouped by ENCODE4 RD guidelines; long lines separate quartiles, p-values were obtained from permutation test assuming equality of distribution (n=1,000). Right: Fraction of UN-ARBS of total per ENCODE4 guideline category grouped by MISP AR motif scores (no ID: score = 0; <1: score <1; >5: score >5).

### Supplementary Figure 3

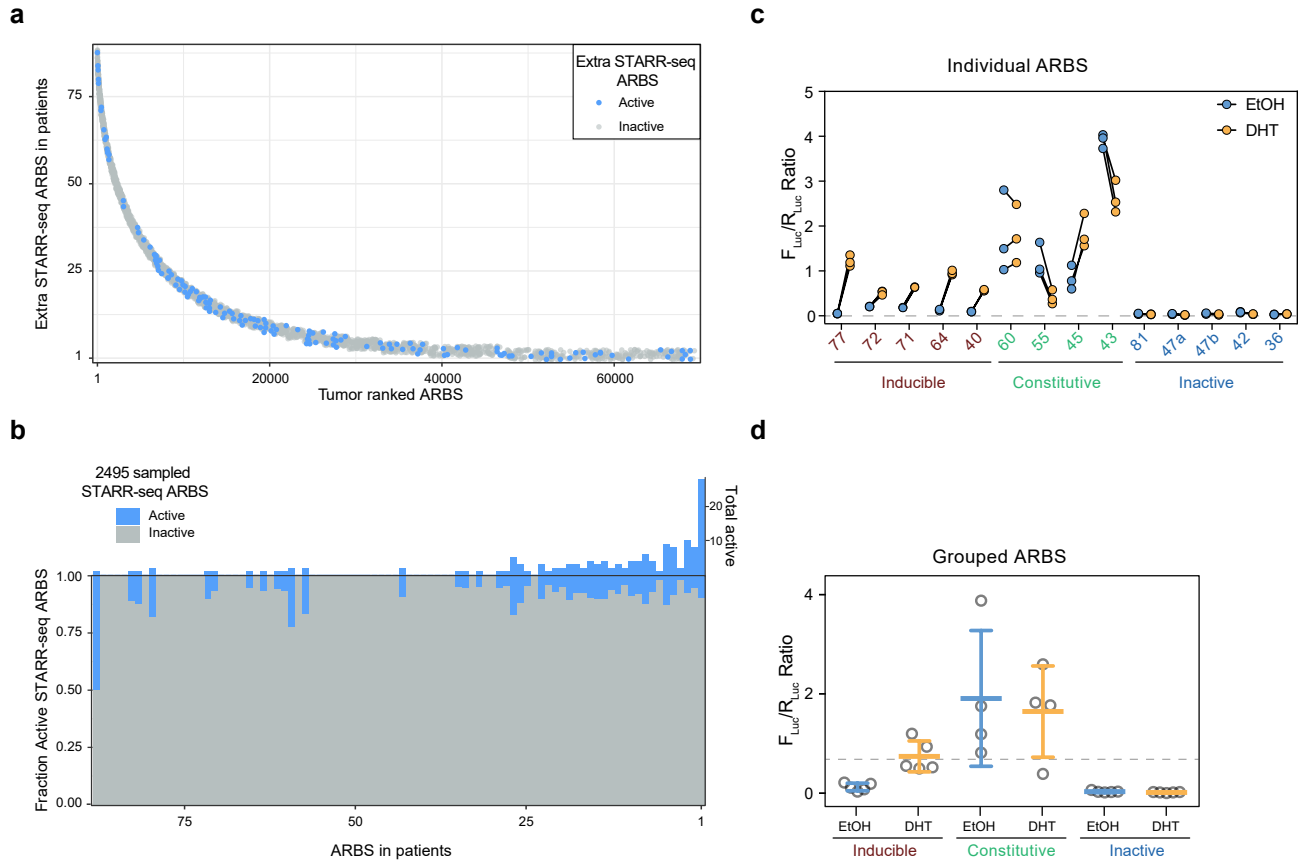

### **Supplementary Figure 3: Extra STARR-seq site distribution and luciferase validation**

(a) Distribution of extra STARR-seq sites in ranked ARBS. Blue dots: extra sites with STARR-seq activity, gray dots: inactive extra sites.

(b) Distribution of extra STARR-seq sites with patient occurrence, top: total extra active sites per patient occurrence, extra active STARR-seq sites (blue), extra inactive STARR-seq sites (grey).

(c) Luciferase assay measured as ratio of Firefly luciferase over Renilla luciferase for inducible, constitutive and inactive ARBS in EtOH (vehicle, blue) vs DHT (yellow) conditions in triplicate with lines indicating triplicate pair ( $n = 3$ ) after DHT stimulation. Numbers indicate occurrence of ARBS in patients out of 88.

(d) Grouped representation of Firefly luciferase over Renilla luciferase ratio for EtOH and DHT conditions of minimum of four experiments of triplicates ( $n = 3$ ). Center line, median; upper and lower quartiles; whiskers, 1.5X interquartile range, points: mean of luciferase assays per ARBS. Error bars denote SD

# Supplementary Figure 4

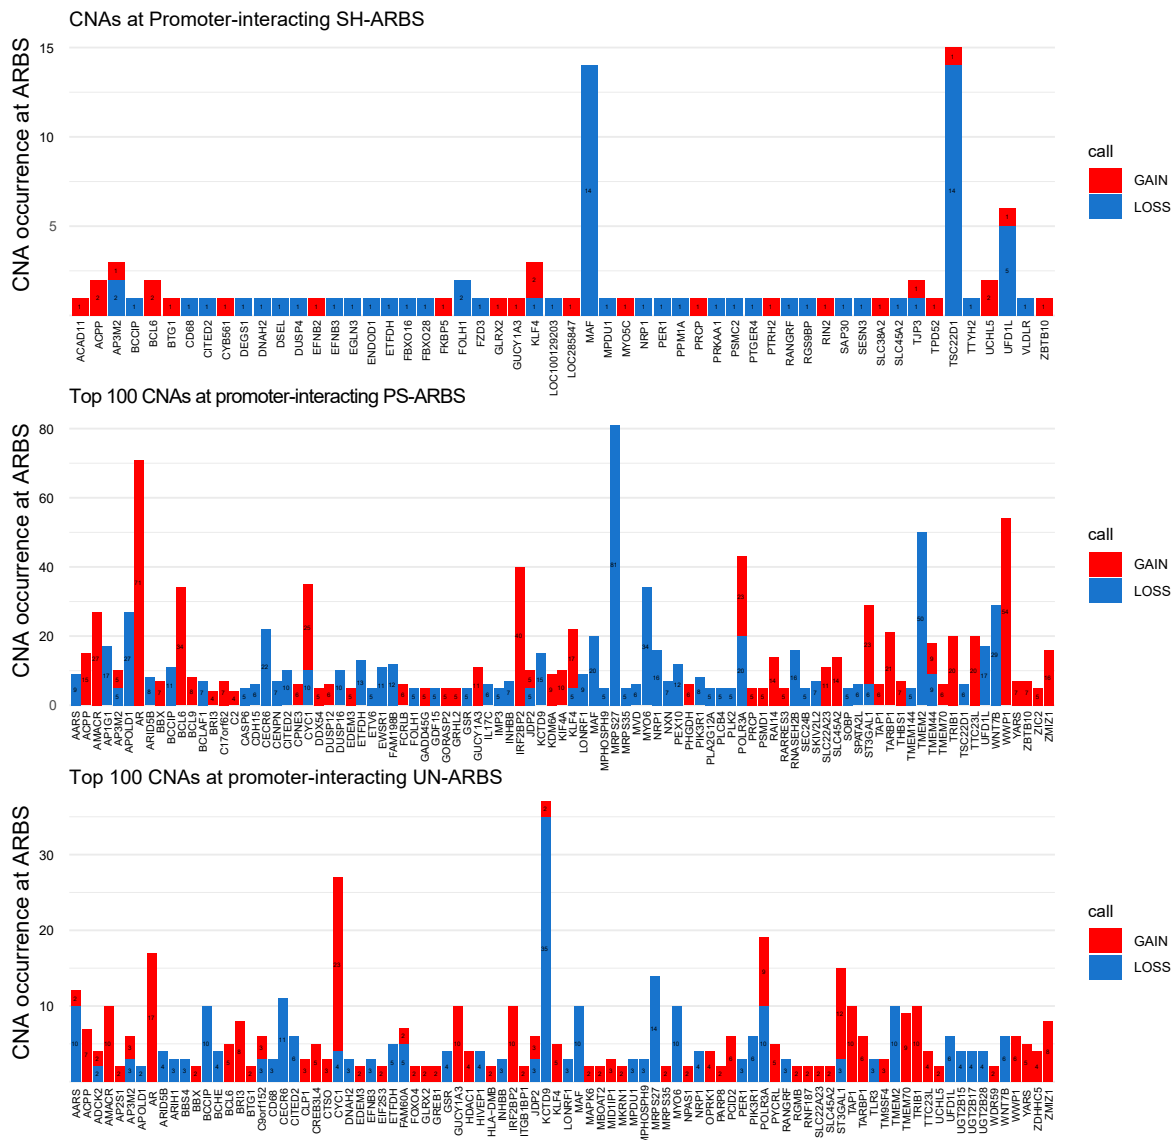

#### **Supplementary Figure 4: Copy number gains and losses at promoter interacting ARBS**

CNA occurrence at promoter-interacting SH-ARBS, PS-ARBS and UN-ARBS showing that most promoter-interacting ARBS are predominantly affected by either copy number gains or losses. Top 100 most-occurring CNAs are plotted for PS-ARBS and UN-ARBS, numbers on bars indicate CNA occurrence.

**Supplementary Figure 5**

**a**

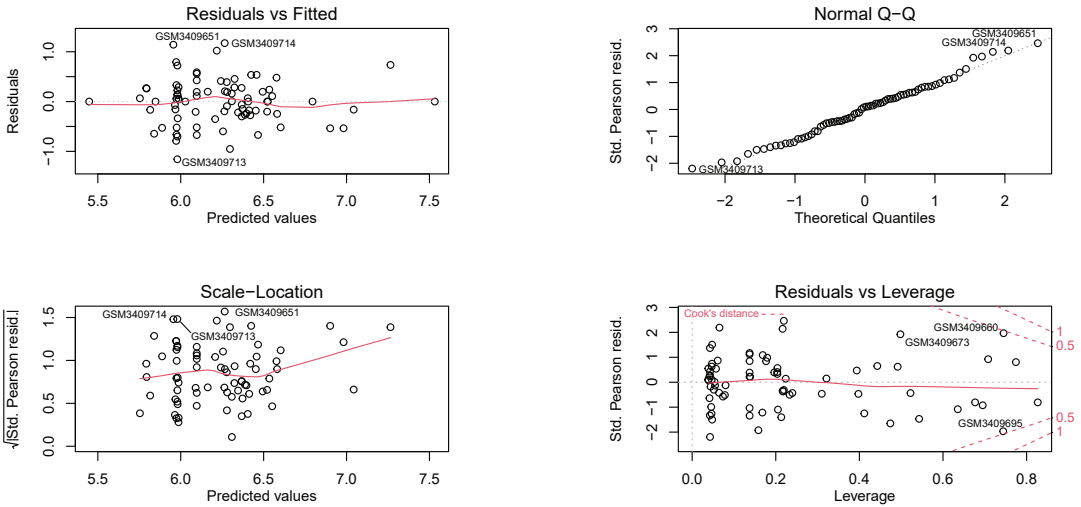

**b**

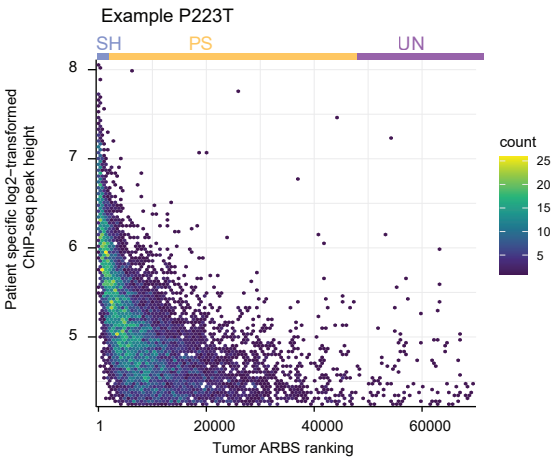

**c**

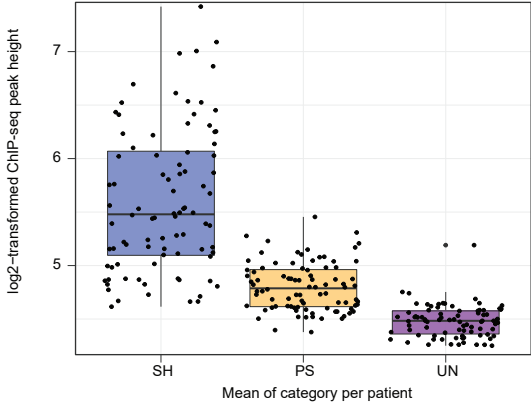

**Supplementary Figure 5: GLM assumption tests and inverse ChIP-seq peak height correlation per category**

(a) CITED2 GLM assumption plots clockwise from top left: residuals versus fitted values plot, linearity testing in normal Q-Q plot, residuals versus leverage plot with Cook's distance plotted in red, scale-location plot. Outlying patients are labelled in the plots.

(b) Example plot of sample P223T detailing AR log<sub>2</sub>-transformed ChIP-seq peak height and ARBS ranking, points are averaged per patient after SH/PS/UN-ARBS binning.

(c) Boxplot of average AR log<sub>2</sub>-transformed ChIP-seq peak height per patient (dots) per ARBS category. Center line, median; upper and lower quartiles; whiskers, 1.5X interquartile range; points, outliers.

## Supplementary Figure 6

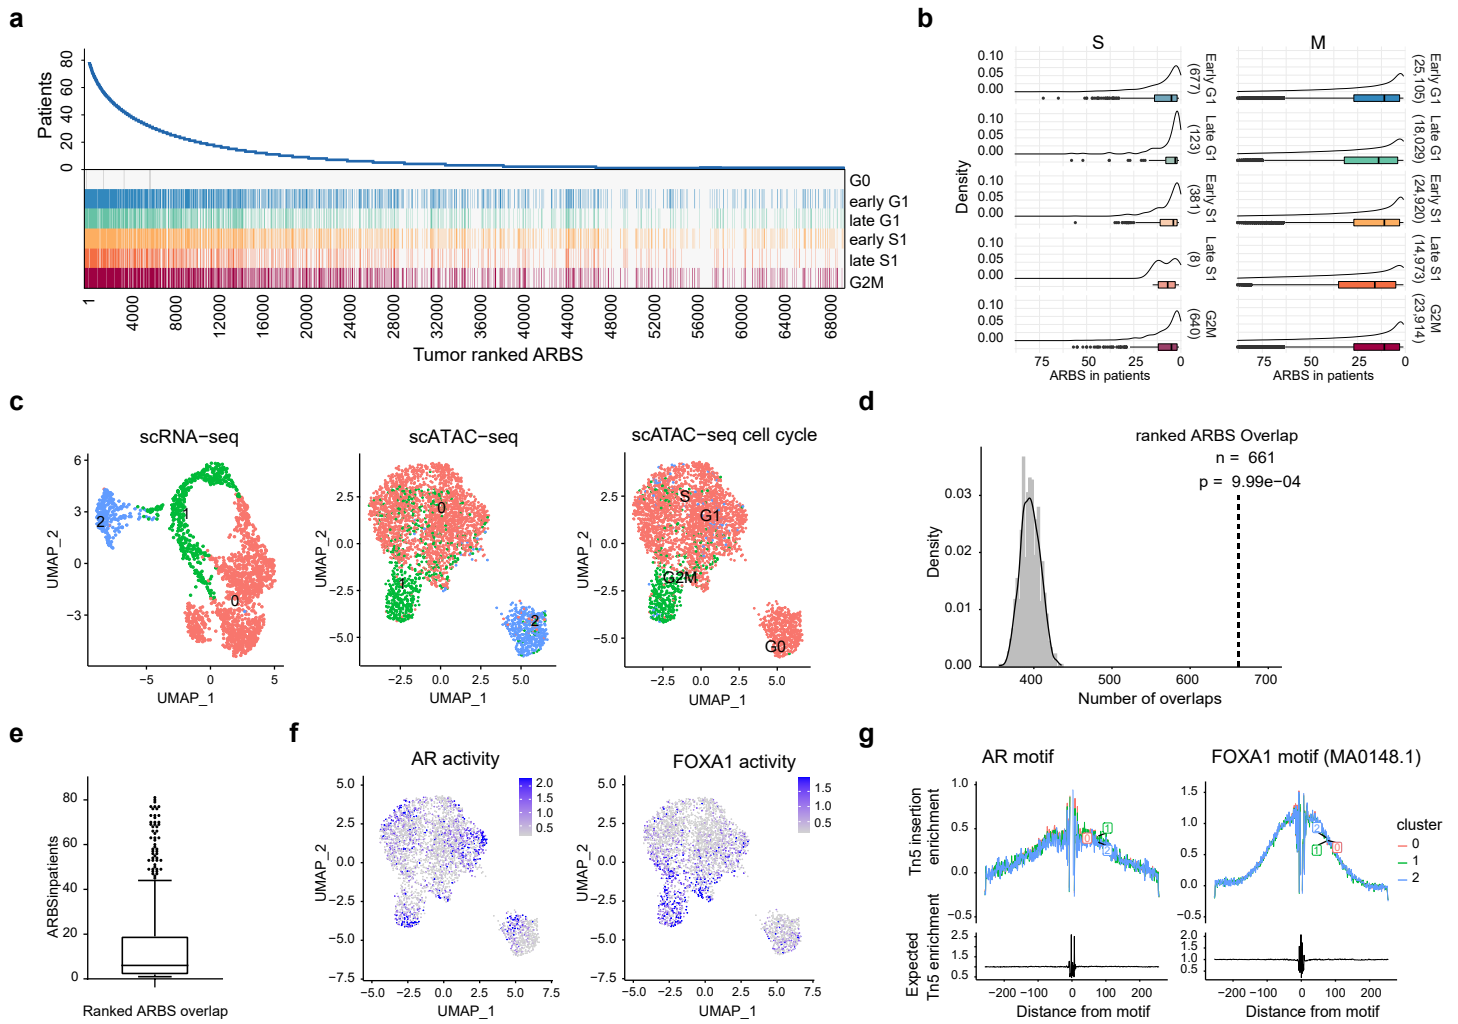



### **Supplementary Figure 6: Heterogeneity of cell cycle specific ARBS and LNCaP chromatin accessibility**

- (a)** Presence of ARBS from cell cycle phase arrested bulk LNCaP in ranked ARBS.
- (b)** Distribution of cell-cycle specific ARBS in patients for sites found specifically in a specific cell cycle (S) or sites found in multiple cell cycles (M). Number of sites ( $n = \text{ARBS}$ ) detailed in parentheses. Center line, median; upper and lower quartiles; whiskers, 1.5X interquartile range; points, outliers.
- (c)** UMAP plots of LNCaP-DMSO scRNA-seq with three distinct clusters (left), LNCaP-DMSO scATAC-seq with the three scRNA-seq cluster labels overlaid (middle) and scATAC-seq with cell cycle phases labels as inferred by gene accessibility and scRNAseq.
- (d)** Density plot of permutation tests of ARBS overlap enrichment at differentially accessible sites versus all background peaks (grey),  $n = 661$  ARBS,  $p = 9.99e-4$ , 1,000 permutations.
- (e)** Differentially accessible ARBS overlap with ranked tumor ARBS for prevalence in patients. Center line, mean; upper and lower quartiles; whiskers, 1.5X interquartile range; points, outliers.
- (f)** AR (left) and FOXA1 (right) activity scores overlaid over scATAC-seq UMAP plots.
- (g)** De novo motif search in differentially accessible peaks showing observed (top) and expected (bottom) Tn5 insertion enrichment around AR and FOXA1 (MA0148.1) motifs among clusters.

# Supplementary Figure 7

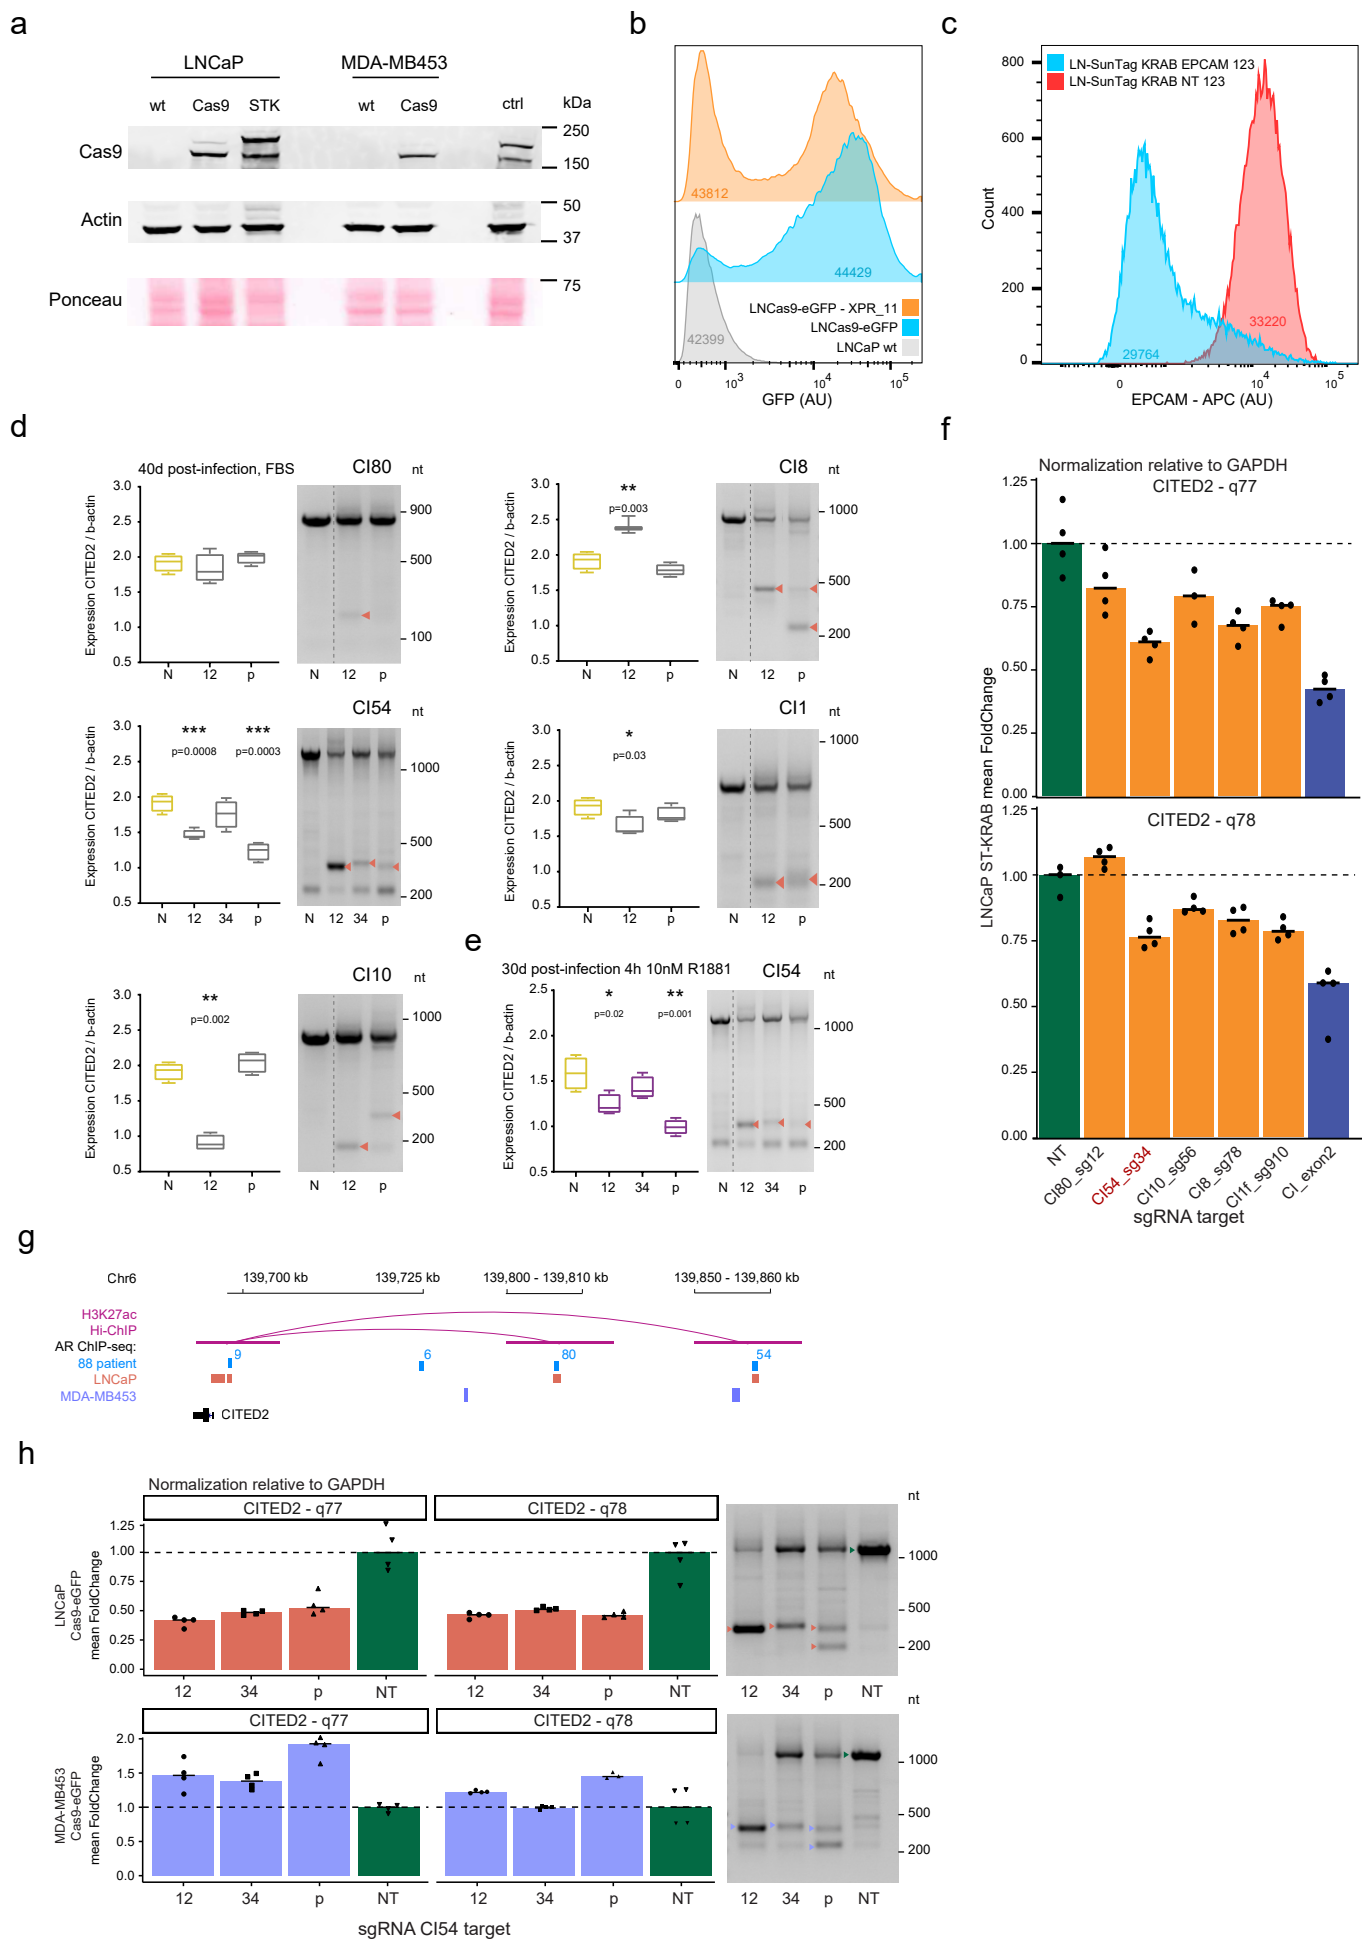

## Supplementary Figure 7: Validation experiments for Cas9-mediated enhancer cuts and repression using Suntag-KRAB

(a) Western blot for Cas9 and actin for Cas9-eGFP infected LNCaP and MDA-MB-453 cells and LNCaP Suntag-KRAB. Control: Cas9+ cell line, loading control actin. Representative experiment of 3 independent blots.

(b) Flow cytometry histograms of GFP for LNCaP wild-type (gray), LNCaP:Cas9-eGFP with NT sgRNA (blue) and LNCaP:Cas9-eGFP with GFP sgRNA (orange). Numbers indicate cell counts.

(c) Flow cytometry histograms of EPCAM-APC for LNCaP:Suntag-KRAB with NT sgRNA pool (red) and LNCaP:Suntag-KRAB with EPCAM sgRNA pool (light blue). Numbers indicate cell counts.

(d) Replicate qPCR of CITED2 over beta-actin and gDNA PCRs of Cas9-mediated ARBS cutting for H3K27ac Hi-ChIP interacting CITED2 enhancers 40 days post-infection in FBS. Center line, median; upper and lower quartiles; whiskers, 1.5X interquartile range, nt = nucleotide weight.

(e) Independent validation of CITED2 expression over beta-actin for Cas9-mediated cut out of CITED2-interacting ARBS found in 54 patients. Cells harvested 30 days post-infection after 3 days of hormonal deprivation and R1881 stimulation. Center line, median; upper and lower quartiles; whiskers, 1.5X interquartile range. Two-tailed Student t-test of means,  $p < 0.05$  \*,  $p < 0.01$  \*\*,  $p < 0.001$  \*\*\*, nt = nucleotide weight.

(f) LNCaP:Suntag-KRAB qPCR of NT normalized CITED2 over GAPDH for H3K27ac HiChIP interacting CITED2 enhancers and CITED2 exon 2 targeting sgRNAs at 7 days post-infection using two different qPCR primer pairs (q77 and q78). Center line indicates median,

(g) Genomic snapshot of CITED2 locus at Chr6 with H3K27ac HiChIP interactions and AR ChIP-seq of 88 primary patients (blue), LNCaP cells (red) and AR<sup>+</sup> breast cancer cell line MDA-MB-453 (purple). Blue numbers indicate number of patients in which ARBS was identified, nt = nucleotide weight.

(h) LNCaP:Cas9-eGFP qPCR of NT sgRNA normalized CITED2 over GAPDH and gDNA verification PCRs of Cas9-mediated ARBS cutting for H3K27ac HiChIP interacting CITED2 enhancers 40 days post-infection in FBS. Center line indicates median, nt = nucleotide weight. Arrows indicate expected bands as result of successful CRISPR pair KO.

# Supplementary Figure 8

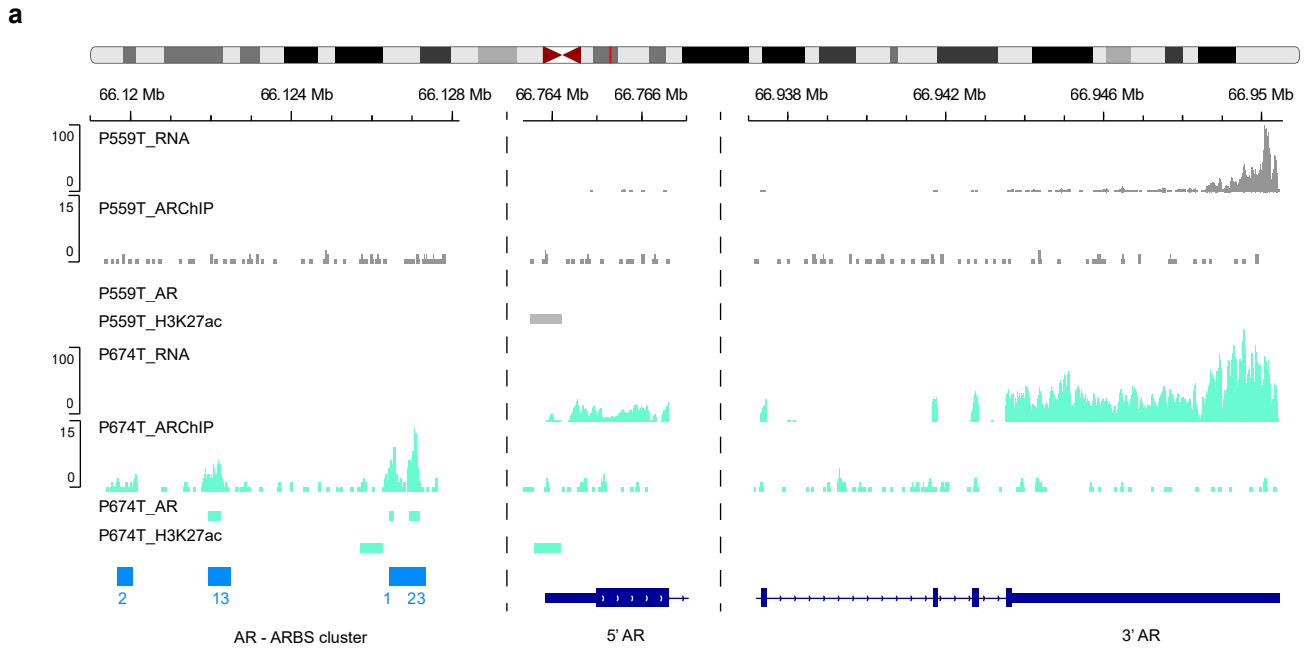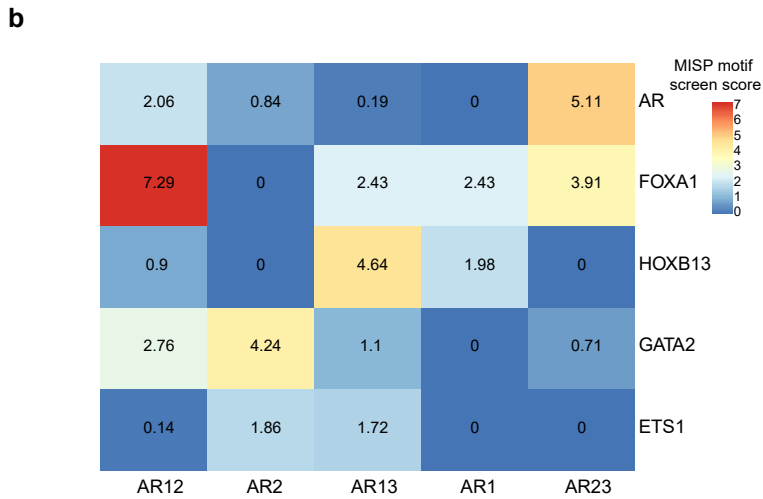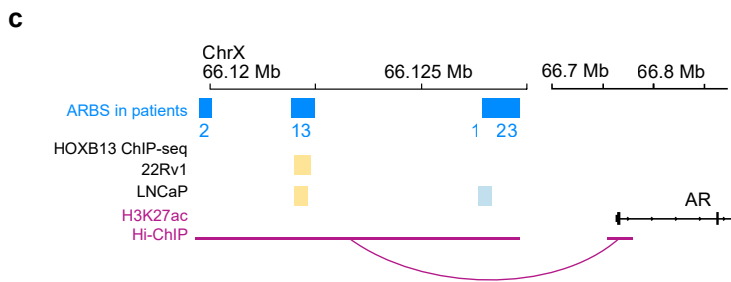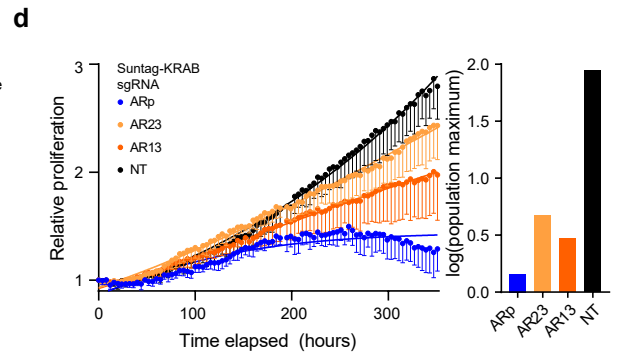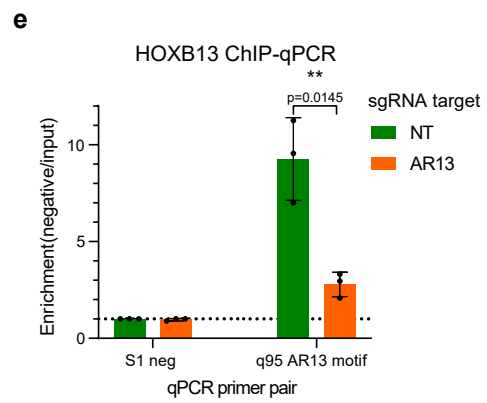

### **Supplementary Figure 8: AR somatic enhancer binding in primary patients and TF motif enrichment**

- (a) IGV genomic snapshot of upstream AR locus and AR coding sequence loci with AR ChIP-seq, H3K27ac ChIP-seq and matched RNA-seq for two selected patient tissues from primary cohort.
- (b) Motif enrichment scores of AR, FOXA1, HOXB13, GATA2 and ETS1 for ARBS found in 12, 2, 13, 1 and 23 patients.
- (c) Genomic snapshot of AR enhancer locus and AR promoter, showing ranked ARBS (occurrence in blue numbers), HOXB13 ChIP-seq for 22Rv1 and LNCaP cells color-coded for MISP-motif score as in (b) and H3K27ac HiChIP interaction data.
- (d) Left: LNCaP:Suntag-KRAB proliferation for sgRNAs targeted at AR promoter (ARp), enhancers AR23, AR13 and Non-targeting (NT) sgRNA. Data are presented as mean values +/- SD.
- (e) HOXB13 ChIP-qPCR of HOXB13 enrichment at AR13 over negative control (S1). Mean of minimum two biological replicates (n=2), Data are presented as mean values +/- SD. Center line, median; upper and lower quartiles; whiskers, 1.5X interquartile range.

# Supplementary Figure 9

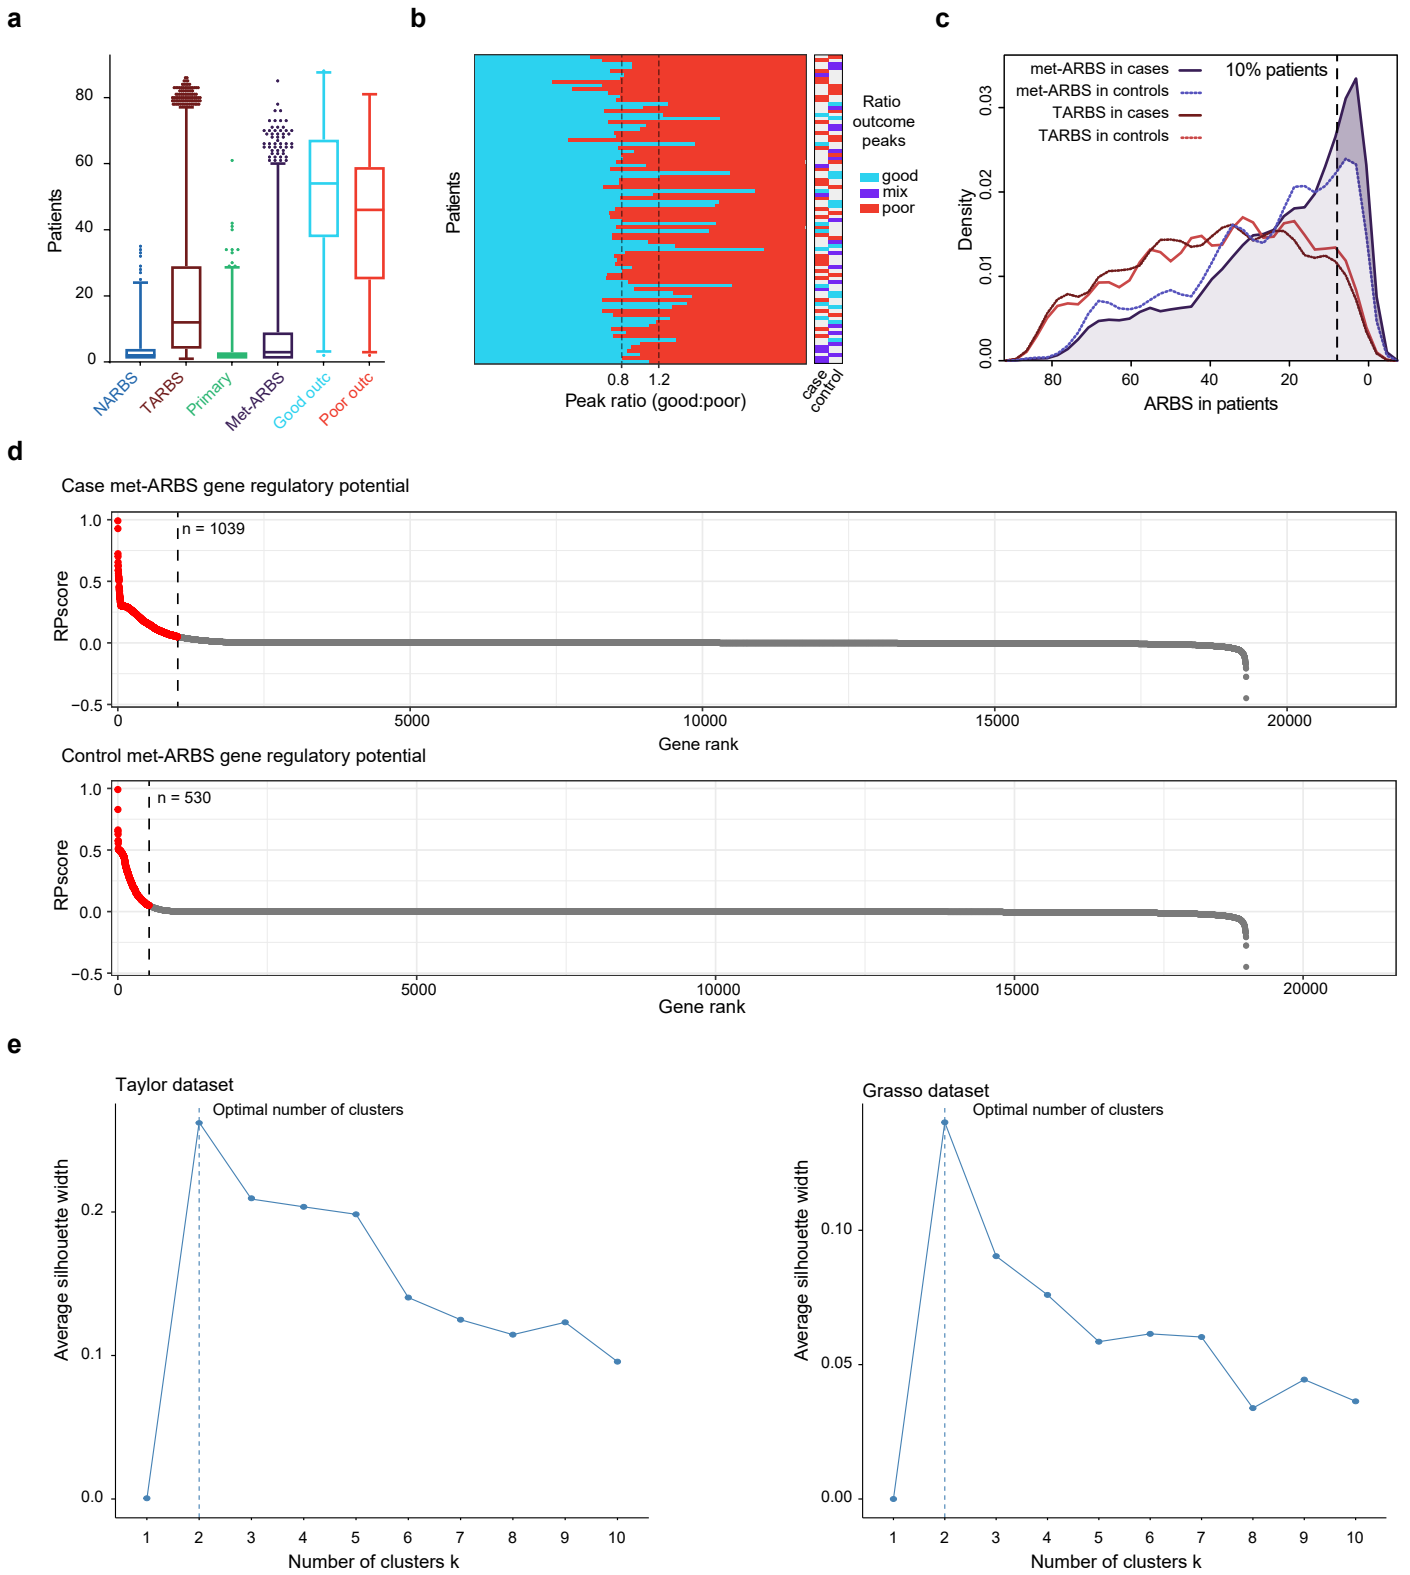

## **Supplementary Figure 9: Quantification of PCa state-specific ARBS, GO RP scores and Silhouette plots**

(a) Distribution of PCa state-specific ARBS among primary tumor ranked ARBS. Center line, median; upper and lower quartiles; whiskers, 1.5X interquartile range; points, outliers.

(b) Left: Overview of good outcome (blue) and bad (red) outcome ARBS distributions of all patients. Dashed lines indicate cut-off for ratio good outcome/poor outcome peaks. Right: Ratio outcome peaks designation based on cut-offs between case and control patients defined by BCR, with patients with equal ratios of good and poor outcome peaks denoted by purple (mix).

(c) Density plots of cumulative occurrence of TARBS and met-ARBS for cases and controls in ranked ARBS. Dotted line indicates ARBS found in < 10% patients, with dark purple fill-in highlighting the difference between cases and controls.

(d) GO Regulatory Potential score ranking of genes for met-ARBS identified in 8 or less case (n=1,024) and control (n=526) primary patients, red: RP score cut-off >0.05.

(e) Silhouette plots for determining optimal k means clustering for Taylor and Grasso PCa tissue expression datasets.

## Supplementary Table 1: Overview of used databases with accession numbers

Study accession overview table indicating what public data was used.

| First author        | Senior author | Year | Ref | DOI                                                                                 | Publication         | Accession                                                                            | Source | Type       | Comment                                                        | ENCODE QC guideline (out of 6) |
|---------------------|---------------|------|-----|-------------------------------------------------------------------------------------|---------------------|--------------------------------------------------------------------------------------|--------|------------|----------------------------------------------------------------|--------------------------------|
| Stelloo             | Zwart         | 2018 | 3   | <a href="https://doi.org/10.1038/s41467-018-07270-2">10.1038/s41467-018-07270-2</a> | Nat Commun          | <a href="https://www.ncbi.nlm.nih.gov/geo/query/acc.cgi?acc=GSE70079">GSE70079</a>   | Tissue | Primary    | Ranked ARBS, matched AR ChIP-seq and RNAseq and outcome on BCR |                                |
| Pomerantz           | Freedman      | 2015 | 4   | <a href="https://doi.org/10.1038/ng.3419">10.1038/ng.3419</a>                       | Nat Gen             | <a href="https://www.ncbi.nlm.nih.gov/geo/query/acc.cgi?acc=GSE56288">GSE56288</a>   | Tissue | Normal     | N-ARBS, combined with Pomerantz et al. 2020 for normal ranking |                                |
| Pomerantz           | Freedman      | 2015 | 4   | <a href="https://doi.org/10.1038/ng.3419">10.1038/ng.3419</a>                       | Nat Gen             | <a href="https://www.ncbi.nlm.nih.gov/geo/query/acc.cgi?acc=GSE56288">GSE56288</a>   | Tissue | Epithelial | T-ARBS                                                         |                                |
| Pomerantz, Qiu, Zhu | Freedman      | 2020 | 5   | <a href="https://doi.org/10.1038/s41588-020-0664-8">10.1038/s41588-020-0664-8</a>   | Nat Gen             | <a href="https://www.ncbi.nlm.nih.gov/geo/query/acc.cgi?acc=GSE130408">GSE130408</a> | Tissue | Normal     | Normal ARBS ranking 8 + 7 samples from N-ARBS                  |                                |
| Pomerantz, Qiu, Zhu | Freedman      | 2020 | 5   | <a href="https://doi.org/10.1038/s41588-020-0664-8">10.1038/s41588-020-0664-8</a>   | Nat Gen             | <a href="https://www.ncbi.nlm.nih.gov/geo/query/acc.cgi?acc=GSE130408">GSE130408</a> | PDX    | mCRPC      | Met-ARBS                                                       | 6                              |
| Takayama            | Inoue         | 2015 | 16  | <a href="https://doi.org/10.1038/ncomms9219">10.1038/ncomms9219</a>                 | Nat Commun          | <a href="https://www.ncbi.nlm.nih.gov/geo/query/acc.cgi?acc=GSE66037">GSE66037</a>   | Cells  | LNCaP-BicR | AR ChIP-seq (combined with own LNCaP ChIP-seq)                 | 6                              |
| Toropainen          | Palvimo       | 2016 | 17  | <a href="https://doi.org/10.1038/srep33510">10.1038/srep33510</a>                   | Sci Rep             | <a href="https://www.ncbi.nlm.nih.gov/geo/query/acc.cgi?acc=GSE84432">GSE84432</a>   | Cells  | VCaP       | AR ChIP-seq (combined with Kron et al.)                        | 6                              |
| Kron                | Lupien        | 2017 | 15  | <a href="https://doi.org/10.1038/ng.3930">10.1038/ng.3930</a>                       | Nat Gen             | <a href="https://www.ncbi.nlm.nih.gov/geo/query/acc.cgi?acc=GSE56086">GSE56086</a>   | Cells  | VCaP       | AR ChIP-seq (combined with Toropainen et al.)                  | 6                              |
| Kron                | Lupien        | 2017 | 15  | <a href="https://doi.org/10.1038/ng.3930">10.1038/ng.3930</a>                       | Nat Gen             | <a href="https://www.ncbi.nlm.nih.gov/geo/query/acc.cgi?acc=GSE56086">GSE56086</a>   | Cells  | 22Rv1      | AR ChIP-seq                                                    | 6                              |
| Pomerantz           | Freedman      | 2015 | 4   | <a href="https://doi.org/10.1038/ng.3419">10.1038/ng.3419</a>                       | Nat Gen             | <a href="https://www.ncbi.nlm.nih.gov/geo/query/acc.cgi?acc=GSE56288">GSE56288</a>   | Cells  | LSHAR      | AR ChIP-seq (combined with own LSHAR ChIP-seq)                 | 6                              |
| Cioni               | Bergman       | 2020 | 18  | <a href="https://doi.org/10.1038/s41467-020-18313-y">10.1038/s41467-020-18313-y</a> | Nat Commun          | <a href="https://www.ncbi.nlm.nih.gov/geo/query/acc.cgi?acc=GSE131381">GSE131381</a> | Cells  | THP-1      | AR ChIP-seq                                                    | 6                              |
| Davies              | Zoubeidi      | 2021 | 54  | <a href="https://doi.org/10.1038/s41556-021-00743-5">10.1038/s41556-021-00743-5</a> | Nat Cell Biol       | <a href="https://www.ncbi.nlm.nih.gov/geo/query/acc.cgi?acc=GSE138460">GSE138460</a> | Cells  | 42D-ENZR   | AR ChIP-seq                                                    | 6                              |
| Malinen             | Palvimo       | 2015 | 19  | <a href="https://doi.org/10.1016/j.mce.2015.07.024">10.1016/j.mce.2015.07.024</a>   | Mol Cell Endocrinol | <a href="https://www.ncbi.nlm.nih.gov/geo/query/acc.cgi?acc=GSE70161">GSE70161</a>   | Cells  | MDA-MB453  | AR ChIP-seq                                                    | 6                              |



|                           |                             |      |    |                                                                                         |                   |                                                                                                  |        |                               |                                                                                  |   |
|---------------------------|-----------------------------|------|----|-----------------------------------------------------------------------------------------|-------------------|--------------------------------------------------------------------------------------------------|--------|-------------------------------|----------------------------------------------------------------------------------|---|
| Huang                     | Lack                        | 2021 | 12 | <a href="https://doi.org/10.1186/s13059-021-02339-6">10.1186/s13059-021-02339-6</a>     | Genome Biol       | <a href="https://www.ncbi.nlm.nih.gov/geo/query/acc.cgi?acc=GSE151064">GSE151064</a>             | Cells  | LNCaP                         | STARR-seq 286 inducible, 463 constitutive, 2467 inact, 1237 pred. ind, 1681 cons |   |
| Zhang                     | Wang                        | 2018 | 76 | <a href="https://doi.org/10.1038/s41467-018-04451-x">10.1038/s41467-018-04451-x</a>     | Nat Commun        | Available upon request                                                                           |        |                               | PCa-specific rSNP                                                                |   |
| Schumacher, Olama         | GAME-ON & ELLIPSE consortia | 2018 | 77 | <a href="https://doi.org/10.1038/s41588-018-0142-8">10.1038/s41588-018-0142-8</a>       | Nat Gen           | <a href="https://www.ncbi.nlm.nih.gov/geo/query/acc.cgi?acc=phs001391.v1.p1">phs001391.v1.p1</a> |        |                               | PCa-specific rSNP                                                                |   |
| DeRycke                   | Thibodeau                   | 2019 | 78 | <a href="https://doi.org/10.1371/journal.pone.0214588">10.1371/journal.pone.0214588</a> | PLOS one          | <a href="https://www.ncbi.nlm.nih.gov/geo/query/acc.cgi?acc=phs000985.v1.p1">phs000985.v1.p1</a> |        |                               | PCa-specific rSNP                                                                |   |
| Pomerantz, Qiu, Zhu       | Freedman                    | 2020 | 5  | <a href="https://doi.org/10.1038/s41588-020-0664-8">10.1038/s41588-020-0664-8</a>       | Nat Gen           | <a href="https://www.ncbi.nlm.nih.gov/geo/query/acc.cgi?acc=GSE130408">GSE130408</a>             |        |                               | PCa-specific rSNP                                                                |   |
| Fraser                    | Boutros                     | 2017 | 10 | <a href="https://doi.org/10.1038/nature20788">10.1038/nature20788</a>                   | Nature            | <a href="https://www.ncbi.nlm.nih.gov/geo/query/acc.cgi?acc=GSE84043">GSE84043</a>               | Tissue | Primary                       | pSNV affected ARBS, 200 WGS and 277 WES                                          |   |
| Quigley                   | Feng                        | 2018 | 11 | <a href="https://doi.org/10.1016/j.cell.2018.06.039">10.1016/j.cell.2018.06.039</a>     | Cell              | <a href="#">Author site</a>                                                                      | Tissue | mCRPC                         | mSNV affected ARBS, 101 metastatic samples                                       |   |
| Jiang                     | Li                          | 2019 | 9  | <a href="https://doi.org/10.1093/nar/gkv1025">10.1093/nar/gkv1025</a>                   | Nucleic Acids Res | -                                                                                                |        | Various cell lines and tissue | Super-enhancer mapping database                                                  |   |
| Khan                      | Zhang                       | 2016 | 76 | <a href="https://doi.org/10.1093/nar/gkv1002">10.1093/nar/gkv1002</a>                   | Nucleic Acids Res |                                                                                                  |        | LNCaP                         | Super-enhancer mapping database                                                  |   |
| Stelloo                   | Zwart                       | 2015 | 8  | <a href="https://doi.org/10.15252/emmm.201505424">10.15252/emmm.201505424</a>           | EMBO Mol Med      | <a href="https://www.ncbi.nlm.nih.gov/geo/query/acc.cgi?acc=GSE65478">GSE65478</a>               | Tissue | normal, primary, ADT          | 138 good, 197 poor outcome sites                                                 |   |
| Pomerantz, Giambartolomei | Freedman                    | 2020 | 5  | <a href="https://doi.org/10.1016/j.ajhg.2021.11.007">10.1016/j.ajhg.2021.11.007</a>     | Nat Gen, AJHG     | <a href="https://www.ncbi.nlm.nih.gov/geo/query/acc.cgi?acc=GSE130408">GSE130408</a>             | Cells  | LNCaP                         | H3K27ac Hi-ChIP chromatin interaction                                            |   |
| Taavitsainen              | Urbanucci                   | 2021 | 14 | <a href="https://doi.org/10.1038/s41467-021-25624-1">10.1038/s41467-021-25624-1</a>     | Nat Commun        | <a href="https://www.ncbi.nlm.nih.gov/geo/query/acc.cgi?acc=GSE168733">GSE168733</a>             | Cells  | LNCaP                         | scATAC-seq                                                                       |   |
| Takeda                    | Freedman                    | 2018 | 13 | <a href="https://doi.org/10.1016/j.cell.2018.05.037">10.1016/j.cell.2018.05.037</a>     | Cell              | <a href="https://www.ncbi.nlm.nih.gov/geo/query/acc.cgi?acc=GSE114385">GSE114385</a>             | Tissue | mCRPC                         | 149 tumors from 60 men, AR enhancer sgRNA tiling screen                          |   |
| Taylor                    | Gerald                      | 2010 | 48 | <a href="https://doi.org/10.1016/j.ccr.2010.05.026">10.1016/j.ccr.2010.05.026</a>       | Cancer Cell       | <a href="https://www.ncbi.nlm.nih.gov/geo/query/acc.cgi?acc=GSE21032">GSE21032</a>               | Tissue | Primary and metastatic        | 218 PCa tumor mRNA expression and outcome                                        |   |
| Grasso                    | Tomlins                     | 2012 | 49 | <a href="https://doi.org/10.1038/nature11125">10.1038/nature11125</a>                   | Nature            | <a href="https://www.ncbi.nlm.nih.gov/geo/query/acc.cgi?acc=GSE35988">GSE35988</a>               | Tissue | Primary and metastatic        | 50 mCRPC and 11 treatment-naïve primary expression                               |   |
| McNair                    | Knudsen                     | 2016 | 41 | <a href="https://doi.org/10.1038/onc.2016.334">10.1038/onc.2016.334</a>                 | Oncogene          | <a href="https://www.ncbi.nlm.nih.gov/geo/query/acc.cgi?acc=GSE82201">GSE82201</a>               | Cells  | LNCaP                         | AR CHIP-seq of cell-cycle arrested LNCaP + DHT                                   | 6 |

## Supplementary Table 2: Primary prostate cancer tissue tumor cell percentage

Pathologist assessment of primary prostate cancer tissues

| Sample ID | % tumor cells | group_key |
|-----------|---------------|-----------|
| P223T     | 80-90%        | 2         |
| P227T     | 70-80%        | 3         |
| P228T     | 80-90%        | 2         |
| P229T     | 80-90%        | 3         |
| P230T     | 80-90%        | 3         |
| P249T     | 70-80%        | 2         |
| P252T     | 80-90%        | 2         |
| P254T     | 80-90%        | 2         |
| P255T     | 70-80%        | 3         |
| P257T     | 80-90%        | 2         |
| P261T     | 70-80%        | 3         |
| P262T     | 70-80%        | 3         |
| P263T     | 70-80%        | 3         |
| P265T     | 70-80%        | 3         |
| P266T     | 70-80%        | 3         |
| P268T     | 70-80%        | 3         |
| P272T     | 80-90%        | 2         |
| P274T     | 80-90%        | 2         |
| P276T     | 80-90%        | 2         |
| P279T     | 80-90%        | 2         |
| P280T     | 70-80%        | 3         |
| P291T     | 70-80%        | 3         |
| P294T     | 80-90%        | 2         |
| P295T     | 70-80%        | 3         |
| P297T     | 80-90%        | 2         |
| P298T     | 80-90%        | 2         |
| P300T     | 80-90%        | 2         |
| P301T     | 80-90%        | 2         |
| P305T     | 70-80%        | 3         |
| P309T     | 80-90%        | 2         |
| P310T     | 80-90%        | 2         |
| P313T     | 80-90%        | 2         |
| P324T     | 70-80%        | 3         |
| P327T     | 70-80%        | 3         |
| P328T     | 70-80%        | 3         |
| P336T     | 80-90%        | 2         |
| P342T     | 70-80%        | 3         |
| P343T     | 80-90%        | 2         |

|       |         |   |
|-------|---------|---|
| P348T | 70-80%  | 3 |
| P349T | 70-80%  | 3 |
| P352T | 80-90%  | 2 |
| P355T | 80-90%  | 2 |
| P416T | 70-80%  | 3 |
| P426T | 70-80%  | 3 |
| P427T | 80-90%  | 2 |
| P431T | 80-90%  | 2 |
| P433T | 80-90%  | 2 |
| P444T | 70-80%  | 3 |
| P449T | 80-90%  | 2 |
| P450T | 70-80%  | 3 |
| P452T | 70-80%  | 3 |
| P456T | 80-90%  | 2 |
| P462T | 80-90%  | 2 |
| P464T | 80-90%  | 2 |
| P466T | 80-90%  | 2 |
| P475T | 70-80%  | 3 |
| P500T | 80-90%  | 2 |
| P506T | 80-90%  | 2 |
| P507T | 80-90%  | 2 |
| P509T | 70-80%  | 3 |
| P511T | 80-90%  | 2 |
| P513T | 70-80%  | 3 |
| P527T | 80-90%  | 2 |
| P531T | 80-90%  | 2 |
| P533T | 80-90%  | 2 |
| P534T | 80-90%  | 2 |
| P536T | 70-80%  | 3 |
| P540T | 70-80%  | 3 |
| P544T | 70-80%  | 3 |
| P552T | 80-90%  | 2 |
| P555T | 80-90%  | 2 |
| P559T | 80-90%  | 2 |
| P560T | 80-90%  | 2 |
| P593  | 80-90%  | 2 |
| P603  | 70-80%  | 3 |
| P618  | 70-80%  | 3 |
| P643  | 70-80%  | 3 |
| P674  | 90-100% | 1 |
| P680  | 80-90%  | 2 |

|      |        |   |
|------|--------|---|
| P695 | 80-90% | 2 |
| P710 | 80-90% | 2 |
| P717 | 70-80% | 3 |
| P730 | 70-80% | 3 |
| P737 | 80-90% | 2 |
| P747 | 80-90% | 2 |
| P779 | 70-80% | 3 |
| P811 | 70-80% | 3 |
| P832 | 80-90% | 2 |

### Supplementary Table 3: AR ChIP-seq peaks identified per tissue sample

Called peaks and accession numbers for used AR-ChIP-seq.

| Sample | ARpeaks_total | SH   | PS    | UN   | Full_acc         |
|--------|---------------|------|-------|------|------------------|
| P223T  | 3712          | 1108 | 2585  | 19   | GSM3409642_P223T |
| P227T  | 11564         | 1190 | 10154 | 220  | GSM3409643_P227T |
| P228T  | 13963         | 1183 | 11987 | 793  | GSM3409644_P228T |
| P229T  | 17596         | 1190 | 15845 | 561  | GSM3409645_P229T |
| P230T  | 14003         | 1201 | 12679 | 123  | GSM3409646_P230T |
| P249T  | 12863         | 1200 | 11504 | 159  | GSM3409647_P249T |
| P252T  | 7476          | 1122 | 6294  | 60   | GSM3409648_P252T |
| P254T  | 3277          | 1132 | 2144  | 1    | GSM3409649_P254T |
| P255T  | 25448         | 1182 | 22592 | 1674 | GSM3409650_P255T |
| P257T  | 5853          | 1112 | 4642  | 99   | GSM3409651_P257T |
| P261T  | 5411          | 1164 | 4237  | 10   | GSM3409652_P261T |
| P262T  | 8290          | 1178 | 7027  | 85   | GSM3409653_P262T |
| P263T  | 3501          | 1129 | 2364  | 8    | GSM3409654_P263T |
| P265T  | 1562          | 762  | 786   | 14   | GSM3409655_P265T |
| P266T  | 20876         | 1193 | 19323 | 360  | GSM3409656_P266T |
| P268T  | 15636         | 1176 | 13006 | 1454 | GSM3409657_P268T |
| P272T  | 2468          | 1037 | 1425  | 6    | GSM3409658_P272T |
| P274T  | 2811          | 995  | 1798  | 18   | GSM3409659_P274T |
| P276T  | 12533         | 1193 | 11141 | 199  | GSM3409660_P276T |
| P279T  | 2122          | 964  | 1151  | 7    | GSM3409661_P279T |
| P280T  | 3941          | 1118 | 2805  | 18   | GSM3409662_P280T |
| P291T  | 1297          | 800  | 494   | 3    | GSM3409663_P291T |
| P294T  | 5884          | 1198 | 4673  | 13   | GSM3409664_P294T |
| P295T  | 236           | 176  | 57    | 3    | GSM3409665_P295T |
| P297T  | 8884          | 1190 | 7600  | 94   | GSM3409666_P297T |
| P298T  | 4235          | 1139 | 3091  | 5    | GSM3409667_P298T |

|       |       |      |       |      |                  |
|-------|-------|------|-------|------|------------------|
| P300T | 7829  | 1166 | 6558  | 105  | GSM3409668_P300T |
| P301T | 16263 | 1179 | 13672 | 1412 | GSM3409669_P301T |
| P305T | 9659  | 1193 | 8332  | 134  | GSM3409670_P305T |
| P309T | 1039  | 648  | 389   | 2    | GSM3409671_P309T |
| P310T | 25149 | 1197 | 22703 | 1249 | GSM3409672_P310T |
| P313T | 10575 | 1186 | 9304  | 85   | GSM3409673_P313T |
| P324T | 13608 | 1194 | 12149 | 265  | GSM3409674_P324T |
| P327T | 108   | 74   | 29    | 5    | GSM3409675_P327T |
| P328T | 2658  | 1004 | 1605  | 49   | GSM3409676_P328T |
| P336T | 2491  | 1017 | 1468  | 6    | GSM3409677_P336T |
| P342T | 4300  | 1021 | 3181  | 98   | GSM3409678_P342T |
| P343T | 30484 | 1189 | 26844 | 2451 | GSM3409679_P343T |
| P348T | 941   | 578  | 353   | 10   | GSM3409680_P348T |
| P349T | 140   | 15   | 54    | 71   | GSM3409681_P349T |
| P352T | 16202 | 1190 | 14834 | 178  | GSM3409682_P352T |
| P355T | 1031  | 657  | 371   | 3    | GSM3409683_P355T |
| P416T | 13429 | 1199 | 12152 | 78   | GSM3409684_P416T |
| P426T | 12801 | 1196 | 11408 | 197  | GSM3409685_P426T |
| P427T | 34106 | 1181 | 29609 | 3316 | GSM3409686_P427T |
| P431T | 4292  | 1115 | 3162  | 15   | GSM3409687_P431T |
| P433T | 181   | 150  | 28    | 3    | GSM3409688_P433T |
| P444T | 263   | 178  | 77    | 8    | GSM3409689_P444T |
| P449T | 4205  | 1121 | 3065  | 19   | GSM3409690_P449T |
| P450T | 2546  | 1019 | 1512  | 15   | GSM3409691_P450T |
| P452T | 572   | 334  | 232   | 6    | GSM3409692_P452T |
| P456T | 8998  | 1192 | 7743  | 63   | GSM3409693_P456T |
| P462T | 17947 | 1189 | 15695 | 1063 | GSM3409694_P462T |
| P464T | 5414  | 1137 | 4220  | 57   | GSM3409695_P464T |
| P466T | 1625  | 872  | 740   | 13   | GSM3409696_P466T |
| P475T | 194   | 145  | 39    | 10   | GSM3409697_P475T |
| P500T | 6643  | 1165 | 5367  | 111  | GSM3409698_P500T |
| P506T | 1621  | 869  | 747   | 5    | GSM3409699_P506T |
| P507T | 12224 | 1191 | 10770 | 263  | GSM3409700_P507T |
| P509T | 14737 | 1197 | 13292 | 248  | GSM3409701_P509T |
| P511T | 3919  | 1124 | 2755  | 40   | GSM3409702_P511T |
| P513T | 6215  | 1136 | 4919  | 160  | GSM3409703_P513T |
| P527T | 9720  | 1189 | 8475  | 56   | GSM3409704_P527T |
| P531T | 1234  | 590  | 638   | 6    | GSM3409705_P531T |
| P533T | 1192  | 656  | 527   | 9    | GSM3409706_P533T |
| P534T | 7546  | 1137 | 6281  | 128  | GSM3409707_P534T |
| P536T | 18130 | 1193 | 16318 | 619  | GSM3409708_P536T |

|       |       |      |       |      |                  |
|-------|-------|------|-------|------|------------------|
| P540T | 8509  | 1198 | 7298  | 13   | GSM3409709_P540T |
| P544T | 659   | 464  | 192   | 3    | GSM3409710_P544T |
| P552T | 15360 | 1194 | 13483 | 683  | GSM3409711_P552T |
| P555T | 369   | 304  | 62    | 3    | GSM3409712_P555T |
| P559T | 953   | 653  | 297   | 3    | GSM3409713_P559T |
| P560T | 1157  | 674  | 478   | 5    | GSM3409714_P560T |
| P593T | 2048  | 989  | 1056  | 3    | GSM3409715_P593T |
| P603T | 904   | 568  | 331   | 5    | GSM3409716_P603T |
| P618T | 21270 | 1181 | 18951 | 1138 | GSM3409717_P618T |
| P643T | 2626  | 1124 | 1500  | 2    | GSM3409718_P643T |
| P674T | 17228 | 1194 | 14527 | 1507 | GSM3409719_P674T |
| P680T | 4066  | 1021 | 3015  | 30   | GSM3409720_P680T |
| P695T | 9289  | 1179 | 7907  | 203  | GSM3409721_P695T |
| P710T | 2353  | 709  | 1617  | 27   | GSM3409722_P710T |
| P717T | 535   | 387  | 142   | 6    | GSM3409723_P717T |
| P730T | 1877  | 942  | 932   | 3    | GSM3409724_P730T |
| P737T | 2355  | 986  | 1368  | 1    | GSM3409725_P737T |
| P747T | 1936  | 805  | 1124  | 7    | GSM3409726_P747T |
| P779T | 212   | 175  | 32    | 5    | GSM3409727_P779T |
| P811T | 5330  | 1116 | 4136  | 78   | GSM3409728_P811T |
| P832T | 3984  | 973  | 2947  | 64   | GSM3409729_P832T |

**Supplementary Table 4: Sequencing read quality control metrics**

Sequencing read quality control metrics including negative strand correlation (NSC), relative strand correlation (RSC), peak number and fraction of reads in peaks score (FRiP).

| Sample_ID | Factor (Antibody)       | Patient_ID | Case_Control | nr reads | fraction mapped | mapped as single read | NSC      | RSC       | Peak number | FRiP score |
|-----------|-------------------------|------------|--------------|----------|-----------------|-----------------------|----------|-----------|-------------|------------|
| P223T_AR  | AR (Santa Cruz; sc-816) | P223T      | Cases        | 24620474 | 0.926469653     | 22810123              | 1.014255 | 0.5828583 | 3741        | 0.59       |
| P227T_AR  | AR (Santa Cruz; sc-816) | P227T      | Cases        | 22532537 | 0.925737523     | 20859216              | 1.031401 | 0.8259269 | 12385       | 2.15       |
| P228T_AR  | AR (Santa Cruz; sc-816) | P228T      | Control      | 22393694 | 0.906389942     | 20297420              | 1.04292  | 0.8170973 | 15065       | 2.75       |
| P229T_AR  | AR (Santa Cruz; sc-816) | P229T      | Cases        | 20102780 | 0.944982933     | 18996785              | 1.083032 | 1.125217  | 18039       | 3.8        |
| P230T_AR  | AR (Santa Cruz; sc-816) | P230T      | Cases        | 25470608 | 0.954118253     | 24301973              | 1.050791 | 1.019307  | 14473       | 2.46       |
| P249T_AR  | AR (Santa Cruz; sc-816) | P249T      | Control      | 24092278 | 0.940599722     | 22661191              | 1.072363 | 1.146209  | 13533       | 2.53       |
| P252T_AR  | AR (Santa Cruz; sc-816) | P252T      | Control      | 21827155 | 0.933125091     | 20367467              | 1.035776 | 0.7780387 | 7676        | 1.43       |
| P254T_AR  | AR (Santa Cruz; sc-816) | P254T      | Exclude      | 22065358 | 0.931446931     | 20552711              | 1.012942 | 0.4856578 | 3299        | 0.49       |
| P255T_AR  | AR (Santa Cruz; sc-816) | P255T      | Cases        | 39760895 | 0.595352796     | 23671761              | 1.10351  | 1.162961  | 26294       | 5.93       |
| P257T_AR  | AR (Santa Cruz; sc-816) | P257T      | Control      | 24398018 | 0.90297966      | 22030915              | 1.01918  | 0.6574779 | 6228        | 0.95       |
| P261T_AR  | AR (Santa Cruz; sc-816) | P261T      | Cases        | 17134997 | 0.952968652     | 16329116              | 1.021821 | 0.590407  | 5462        | 0.98       |
| P262T_AR  | AR (Santa Cruz; sc-816) | P262T      | Control      | 22083425 | 0.917859571     | 20269484              | 1.029478 | 0.708004  | 8525        | 1.51       |
| P263T_AR  | AR (Santa Cruz; sc-816) | P263T      | Control      | 25254852 | 0.952162618     | 24046727              | 1.011729 | 0.5730436 | 3520        | 0.5        |
| P265T_AR  | AR (Santa Cruz; sc-816) | P265T      | Cases        | 24537475 | 0.965765141     | 23697439              | 1.010187 | 0.4820882 | 1631        | 0.21       |
| P266T_AR  | AR (Santa Cruz; sc-816) | P266T      | Control      | 18391065 | 0.952325599     | 17514283              | 1.102531 | 1.250378  | 21530       | 5.12       |
| P268T_AR  | AR (Santa Cruz; sc-816) | P268T      | Cases        | 18530102 | 0.942160167     | 17458325              | 1.055521 | 0.9800846 | 16440       | 3.62       |
| P272T_AR  | AR (Santa Cruz; sc-816) | P272T      | Control      | 22882964 | 0.957330265     | 21906555              | 1.013207 | 0.4651862 | 2506        | 0.35       |
| P274T_AR  | AR (Santa Cruz; sc-816) | P274T      | Cases        | 18531555 | 0.919200143     | 17034209              | 1.023941 | 0.6022613 | 2905        | 0.47       |
| P276T_AR  | AR (Santa Cruz; sc-816) | P276T      | Cases        | 10230637 | 0.873984875     | 8941423               | 1.088797 | 0.8957601 | 12649       | 3.65       |
| P279T_AR  | AR (Santa Cruz; sc-816) | P279T      | Control      | 22890081 | 0.932096833     | 21335773              | 1.013752 | 0.5239322 | 2135        | 0.33       |
| P280T_AR  | AR (Santa Cruz; sc-816) | P280T      | Control      | 24308849 | 0.925808581     | 22505342              | 1.018043 | 0.6037517 | 4013        | 0.61       |
| P291T_AR  | AR (Santa Cruz; sc-816) | P291T      | Exclude      | 26473609 | 0.93913006      | 24862163              | 1.009063 | 0.4102503 | 1308        | 0.2        |
| P294T_AR  | AR (Santa Cruz; sc-816) | P294T      | Cases        | 27577000 | 0.966994815     | 26666817              | 1.015899 | 0.7373516 | 5975        | 0.88       |
| P295T_AR  | AR (Santa Cruz; sc-816) | P295T      | Cases        | 21782551 | 0.932503039     | 20312296              | 1.007714 | 0.29512   | 243         | 0.06       |
| P297T_AR  | AR (Santa Cruz; sc-816) | P297T      | Control      | 20423475 | 0.842618213     | 17209193              | 1.032097 | 0.6877458 | 9292        | 1.74       |
| P298T_AR  | AR (Santa Cruz; sc-816) | P298T      | Cases        | 31717776 | 0.965477025     | 30622785              | 1.011609 | 0.6345308 | 4277        | 0.62       |
| P300T_AR  | AR (Santa Cruz; sc-816) | P300T      | Control      | 18024314 | 0.964227376     | 17379538              | 1.024965 | 0.7435726 | 7930        | 1.49       |
| P301T_AR  | AR (Santa Cruz; sc-816) | P301T      | Cases        | 15337785 | 0.93041003      | 14270430              | 1.074537 | 1.040754  | 17971       | 4          |

|          |                         |       |         |          |             |          |          |           |       |      |
|----------|-------------------------|-------|---------|----------|-------------|----------|----------|-----------|-------|------|
| P305T_AR | AR (Santa Cruz; sc-816) | P305T | Control | 17057286 | 0.933874475 | 15929365 | 1.033817 | 0.7666989 | 9721  | 1.77 |
| P309T_AR | AR (Santa Cruz; sc-816) | P309T | Cases   | 15343434 | 0.959416125 | 14720739 | 1.010899 | 0.3537316 | 1053  | 0.19 |
| P310T_AR | AR (Santa Cruz; sc-816) | P310T | Cases   | 19842529 | 0.922866989 | 18312016 | 1.158604 | 1.350412  | 25931 | 6.19 |
| P313T_AR | AR (Santa Cruz; sc-816) | P313T | Cases   | 23622319 | 0.925976954 | 21873724 | 1.040194 | 1.097381  | 10685 | 2.05 |
| P324T_AR | AR (Santa Cruz; sc-816) | P324T | Control | 27881638 | 0.780162055 | 21752197 | 1.034603 | 0.7534276 | 14256 | 2.44 |
| P327T_AR | AR (Santa Cruz; sc-816) | P327T | Cases   | 22873723 | 0.804624765 | 18404765 | 1.010837 | 0.2930086 | 112   | 0.04 |
| P328T_AR | AR (Santa Cruz; sc-816) | P328T | Control | 21117434 | 0.839515871 | 17728422 | 1.019486 | 0.4815153 | 2835  | 0.45 |
| P336T_AR | AR (Santa Cruz; sc-816) | P336T | Control | 25665987 | 0.950061106 | 24384257 | 1.011008 | 0.5393414 | 2532  | 0.36 |
| P342T_AR | AR (Santa Cruz; sc-816) | P342T | Control | 22714184 | 0.917901431 | 20849383 | 1.015971 | 0.5750244 | 4428  | 0.7  |
| P343T_AR | AR (Santa Cruz; sc-816) | P343T | Cases   | 16790768 | 0.891348091 | 14966420 | 1.175974 | 1.284918  | 32286 | 8.28 |
| P348T_AR | AR (Santa Cruz; sc-816) | P348T | Cases   | 37451664 | 0.686169538 | 25698192 | 1.008018 | 0.3310427 | 956   | 0.13 |
| P349T_AR | AR (Santa Cruz; sc-816) | P349T | Control | 16625464 | 0.570367239 | 9482621  | 1.044588 | 0.5297713 | 159   | 0.05 |
| P352T_AR | AR (Santa Cruz; sc-816) | P352T | Cases   | 16801279 | 0.770909167 | 12952261 | 1.113918 | 1.121093  | 16598 | 4.43 |
| P355T_AR | AR (Santa Cruz; sc-816) | P355T | Cases   | 24516545 | 0.964314221 | 23641654 | 1.009308 | 0.4370284 | 1037  | 0.14 |
| P416T_AR | AR (Santa Cruz; sc-816) | P416T | Control | 21707438 | 0.913058879 | 19820170 | 1.064851 | 1.078288  | 13569 | 2.88 |
| P426T_AR | AR (Santa Cruz; sc-816) | P426T | Cases   | 27969311 | 0.714637268 | 19987913 | 1.040421 | 0.7639348 | 13213 | 2.58 |
| P427T_AR | AR (Santa Cruz; sc-816) | P427T | Control | 23331954 | 0.941921924 | 21976880 | 1.165201 | 1.287467  | 35444 | 8.52 |
| P431T_AR | AR (Santa Cruz; sc-816) | P431T | Cases   | 20023371 | 0.952344338 | 19069145 | 1.015911 | 0.5586526 | 4320  | 0.72 |
| P433T_AR | AR (Santa Cruz; sc-816) | P433T | Control | 17673974 | 0.945158174 | 16704702 | 1.008366 | 0.28976   | 187   | 0.04 |
| P444T_AR | AR (Santa Cruz; sc-816) | P444T | Control | 33080874 | 0.702958332 | 23254477 | 1.008699 | 0.3178689 | 280   | 0.04 |
| P449T_AR | AR (Santa Cruz; sc-816) | P449T | Cases   | 25850491 | 0.943894489 | 24400137 | 1.015309 | 0.659915  | 4265  | 0.75 |
| P450T_AR | AR (Santa Cruz; sc-816) | P450T | Cases   | 19632834 | 0.914069665 | 17945779 | 1.015074 | 0.4567794 | 2604  | 0.43 |
| P452T_AR | AR (Santa Cruz; sc-816) | P452T | Cases   | 18301541 | 0.940094881 | 17205186 | 1.008353 | 0.3298432 | 586   | 0.08 |
| P456T_AR | AR (Santa Cruz; sc-816) | P456T | Control | 16474488 | 0.949295905 | 15639165 | 1.044092 | 0.9712267 | 9139  | 1.96 |
| P462T_AR | AR (Santa Cruz; sc-816) | P462T | Cases   | 19416843 | 0.956555965 | 18573298 | 1.067002 | 1.111203  | 18152 | 3.85 |
| P464T_AR | AR (Santa Cruz; sc-816) | P464T | Cases   | 23412496 | 0.95579177  | 22377472 | 1.015796 | 0.6188879 | 5444  | 0.9  |
| P466T_AR | AR (Santa Cruz; sc-816) | P466T | Control | 23740042 | 0.725033427 | 17212325 | 1.012576 | 0.3166301 | 1637  | 0.28 |
| P475T_AR | AR (Santa Cruz; sc-816) | P475T | Control | 16396532 | 0.735520719 | 12059990 | 1.014086 | 0.2615917 | 197   | 0.11 |
| P500T_AR | AR (Santa Cruz; sc-816) | P500T | Cases   | 22743775 | 0.957414238 | 21775215 | 1.02012  | 0.7443276 | 6988  | 1.18 |
| P506T_AR | AR (Santa Cruz; sc-816) | P506T | Cases   | 18892336 | 0.95161276  | 17978189 | 1.011238 | 0.3894433 | 1635  | 0.28 |



|          |                         |       |         |          |             |          |          |           |       |      |
|----------|-------------------------|-------|---------|----------|-------------|----------|----------|-----------|-------|------|
| P507T_AR | AR (Santa Cruz; sc-816) | P507T | Control | 23640431 | 0.952227055 | 22511059 | 1.050234 | 1.089082  | 12527 | 2.69 |
| P509T_AR | AR (Santa Cruz; sc-816) | P509T | Control | 24838040 | 0.950150777 | 23599884 | 1.045322 | 1.027597  | 15205 | 2.87 |
| P511T_AR | AR (Santa Cruz; sc-816) | P511T | Control | 10169031 | 0.858821553 | 8733384  | 1.035416 | 0.4732332 | 3981  | 0.98 |
| P513T_AR | AR (Santa Cruz; sc-816) | P513T | Control | 7600645  | 0.854784693 | 6496916  | 1.089194 | 0.5451723 | 6471  | 2.15 |
| P527T_AR | AR (Santa Cruz; sc-816) | P527T | Cases   | 23525604 | 0.889926822 | 20936067 | 1.034908 | 0.8335207 | 9778  | 1.73 |
| P531T_AR | AR (Santa Cruz; sc-816) | P531T | Cases   | 17387106 | 0.925676015 | 16094828 | 1.011333 | 0.3573592 | 1244  | 0.19 |
| P533T_AR | AR (Santa Cruz; sc-816) | P533T | Control | 10137898 | 0.908096136 | 9206187  | 1.024668 | 0.4177768 | 1197  | 0.32 |
| P534T_AR | AR (Santa Cruz; sc-816) | P534T | Control | 10344994 | 0.881695533 | 9121136  | 1.050203 | 0.58669   | 7717  | 2.02 |
| P536T_AR | AR (Santa Cruz; sc-816) | P536T | Cases   | 19451396 | 0.944123908 | 18364529 | 1.056687 | 1.03814   | 18517 | 3.65 |
| P540T_AR | AR (Santa Cruz; sc-816) | P540T | Control | 24787062 | 0.965102439 | 23922055 | 1.022654 | 0.8363826 | 8581  | 1.34 |
| P544T_AR | AR (Santa Cruz; sc-816) | P544T | Control | 24497185 | 0.963530014 | 23603774 | 1.008138 | 0.4303424 | 670   | 0.09 |
| P552T_AR | AR (Santa Cruz; sc-816) | P552T | Cases   | 19634450 | 0.926693185 | 18195112 | 1.053509 | 0.9875975 | 15685 | 3.03 |
| P555T_AR | AR (Santa Cruz; sc-816) | P555T | Control | 24564693 | 0.964565199 | 23694249 | 1.008108 | 0.4398692 | 372   | 0.06 |
| P559T_AR | AR (Santa Cruz; sc-816) | P559T | Cases   | 18546627 | 0.948469067 | 17590903 | 1.010282 | 0.412166  | 979   | 0.15 |
| P560T_AR | AR (Santa Cruz; sc-816) | P560T | Control | 22990170 | 0.932291888 | 21433550 | 1.008363 | 0.3770089 | 1176  | 0.19 |
| P593T_AR | AR (Santa Cruz; sc-816) | P593T | Control | 21569433 | 0.946475181 | 20414934 | 1.010544 | 0.4512739 | 2056  | 0.31 |
| P603T_AR | AR (Santa Cruz; sc-816) | P603T | Control | 22122389 | 0.909496981 | 20120247 | 1.008241 | 0.3296038 | 910   | 0.12 |
| P618T_AR | AR (Santa Cruz; sc-816) | P618T | Cases   | 22496530 | 0.92879893  | 20894754 | 1.07833  | 1.149379  | 22334 | 4.83 |
| P643T_AR | AR (Santa Cruz; sc-816) | P643T | Cases   | 39410557 | 0.954011992 | 37598145 | 1.008729 | 0.5514827 | 2645  | 0.38 |
| P674T_AR | AR (Santa Cruz; sc-816) | P674T | Control | 23990337 | 0.963961073 | 23125752 | 1.061178 | 1.214612  | 17570 | 3.17 |
| P680T_AR | AR (Santa Cruz; sc-816) | P680T | Control | 32039846 | 0.967549688 | 31000144 | 1.01152  | 0.651814  | 4115  | 0.63 |
| P695T_AR | AR (Santa Cruz; sc-816) | P695T | Control | 30185677 | 0.967926709 | 29217524 | 1.019941 | 0.8212429 | 9377  | 1.5  |
| P710T_AR | AR (Santa Cruz; sc-816) | P710T | Cases   | 21053335 | 0.953726761 | 20079130 | 1.010814 | 0.4853518 | 2371  | 0.36 |
| P717T_AR | AR (Santa Cruz; sc-816) | P717T | Cases   | 27656933 | 0.945459245 | 26148504 | 1.005989 | 0.2997338 | 540   | 0.08 |
| P730T_AR | AR (Santa Cruz; sc-816) | P730T | Cases   | 25477648 | 0.944103239 | 24053531 | 1.009375 | 0.4354283 | 1894  | 0.28 |
| P737T_AR | AR (Santa Cruz; sc-816) | P737T | Cases   | 40315672 | 0.95573637  | 38531155 | 1.007202 | 0.4819284 | 2367  | 0.33 |
| P747T_AR | AR (Santa Cruz; sc-816) | P747T | Control | 25064139 | 0.942388885 | 23620167 | 1.009182 | 0.4016096 | 1954  | 0.29 |
| P779T_AR | AR (Santa Cruz; sc-816) | P779T | Control | 23151291 | 0.925237431 | 21420442 | 1.006052 | 0.2822717 | 216   | 0.03 |
| P811T_AR | AR (Santa Cruz; sc-816) | P811T | Cases   | 22317858 | 0.69529876  | 15517580 | 1.023737 | 0.4960241 | 5482  | 1.08 |
| P832T_AR | AR (Santa Cruz; sc-816) | P832T | Control | 31799628 | 0.948560467 | 30163871 | 1.010932 | 0.5420255 | 4147  | 0.6  |

**Supplementary Table 5: Total tumor ranked ARBS identified in cell lines**

Identified tumor ranked ARBS per AR-ChIP-seq cell line dataset

| ARBS overlap | Tumor | Normal |
|--------------|-------|--------|
| EnzR_42D     | 2117  | 1075   |
| LNBR         | 5980  | 3486   |
| LNCAP        | 28105 | 10449  |
| VCAP         | 24270 | 9848   |
| 22RV1        | 9403  | 3794   |
| LSHAR        | 21943 | 13960  |
| MDAMB453     | 1046  | 3866   |
| THP-1        | 7462  | 422    |

### Supplementary Table 6: Luciferase validation of STARR-seq

Overview of assayed STARR-seq ARBS in luciferase validation experiment, including locus, enhID and patient prevalence.

| chr   | start     | end       | EtOH_Rep 1  | EtOH_Rep 2  | EtOH_Rep 3  | DHT_Rep 1   | DHT_Rep 2   | DHT_Rep 3   | enhID | patients | Classification | Region             |
|-------|-----------|-----------|-------------|-------------|-------------|-------------|-------------|-------------|-------|----------|----------------|--------------------|
| chr15 | 99346784  | 99347415  | 0.129579982 | 0.110749186 | 0.141772152 | 0.917870722 | 0.943234837 | 1.013771997 | 881   | 64       | Inducible      | 2022-ARBS          |
| chr13 | 77629275  | 77629836  | 0.099483823 | 0.093511087 | 0.093104036 | 0.56368434  | 0.558885925 | 0.584075505 | 3815  | 40       | Inducible      | 434-ARBS           |
| chr12 | 47186625  | 47187264  | 0.052362805 | 0.045936825 | 0.050319197 | 1.356236625 | 1.109414576 | 1.187467919 | 215   | 77       | Inducible      | 1413-ARBS          |
| chr17 | 34148294  | 34148884  | 0.207704799 | 0.209264042 | 0.204826647 | 0.545322685 | 0.537096807 | 0.466615575 | 1995  | 72       | Inducible      | 789-ARBS           |
| chr11 | 34692562  | 34693146  | 0.235960238 | 0.230558235 | 0.225129781 | 0.549161476 | 0.532444522 | 0.537889354 | 5124  | 34       | Inducible      | 559-ARBS           |
| chr1  | 10695822  | 10696501  | 3.73084753  | 4.034394432 | 3.960286649 | 2.316693768 | 2.533351699 | 3.022447372 | 3240  | 43       | Constitutive   | 254-ARBS           |
| chr7  | 86973621  | 86974175  | 0.779571601 | 0.600813317 | 1.127591241 | 1.561161872 | 1.70711317  | 2.280861761 | 2896  | 45       | Constitutive   | 72-ARBS            |
| chr2  | 237906442 | 237907527 | 0.957694637 | 1.038722503 | 1.635756057 | 0.270188877 | 0.365211028 | 0.582504441 | 1623  | 55       | Constitutive   | 1791-ARBS          |
| chr9  | 117670263 | 117670916 | 1.030121717 | 1.494792795 | 2.802194692 | 1.186594042 | 1.714205819 | 2.482880322 | 755   | 60       | Constitutive   | 2220-ARBS          |
| chr2  | 153158557 | 153159194 | 0.093897755 | 0.068651525 | 0.081650033 | 0.03733557  | 0.034932625 | 0.043552088 | 3387  | 42       | Inactive       | 416-ARBS           |
| chr2  | 23968519  | 23969094  | 0.023605827 | 0.034862776 | 0.029906555 | 0.041842416 | 0.035905024 | 0.042799543 | 4639  | 36       | Inactive       | 469-ARBS           |
| chr2  | 215259605 | 215260264 | 0.041315127 | 0.036496948 | 0.054085844 | 0.037596024 | 0.026994587 | 0.032186209 | 89    | 81       | Inactive       | 661-ARBS           |
| chr2  | 79344574  | 79345178  | 0.035029072 | 0.031500267 | 0.047548748 | 0.016123835 | 0.016494502 | 0.022189893 | 2560  | 47       | Inactive       | 2102-ARBS<br>(47a) |
| chr11 | 74088679  | 74089252  | 0.044581746 | 0.03998185  | 0.060440622 | 0.026107944 | 0.021728414 | 0.042867508 | 2542  | 47       | Inactive       | 2702-ARBS<br>(47b) |

### Supplementary Table 7: Copy Number Alterations at the upstream AR enhancer locus

Identified copy number gains at upstream AR enhancer locus with patient ID.

| chr  | start    | end      | patid       | call |
|------|----------|----------|-------------|------|
| chrX | 66073001 | 66701000 | DTB-156-BL  | GAIN |
| chrX | 65107001 | 66188000 | DTB-069-BL  | GAIN |
| chrX | 66047001 | 66294000 | DTB-126-BL  | GAIN |
| chrX | 65758001 | 66263000 | DTB-176-BL  | GAIN |
| chrX | 65729001 | 66496000 | DTB-265-PRO | GAIN |
| chrX | 64895001 | 66749000 | DTB-175-BL  | GAIN |
| chrX | 62515001 | 66310000 | DTB-091-BL  | GAIN |
| chrX | 66097001 | 66351000 | DTB-092-BL  | GAIN |
| chrX | 57742001 | 66158000 | DTB-071-BL  | GAIN |
| chrX | 65525001 | 66580000 | DTB-005-BL  | GAIN |
| chrX | 65616501 | 66478000 | DTB-137-PRO | GAIN |
| chrX | 65474001 | 66192000 | DTB-024-PRO | GAIN |
| chrX | 56351001 | 66621000 | DTB-205-BL  | GAIN |
| chrX | 63801001 | 66320000 | DTB-037-BL  | GAIN |
| chrX | 65393001 | 66449000 | DTB-102-PRO | GAIN |
| chrX | 58499001 | 66755000 | DTB-214-BL  | GAIN |
| chrX | 65700001 | 66687000 | DTB-089-BL  | GAIN |
| chrX | 65919001 | 65993000 | DTB-186-BL  | GAIN |
| chrX | 64866001 | 66026000 | DTB-085-BL  | GAIN |
| chrX | 64309001 | 66024000 | DTB-151-BL  | GAIN |
| chrX | 65621001 | 66097000 | DTB-092-BL  | GAIN |
| chrX | 65800001 | 66047000 | DTB-126-BL  | GAIN |
| chrX | 58499001 | 66035000 | DTB-216-PRO | GAIN |

### Supplementary Table 8: DepMap IDs used for accession of CRISPR KO databases

Accession codes for genome-wide KO screens deposited in <https://depmap.org/portal/>.

| cell line | DB                  | dep_id     |
|-----------|---------------------|------------|
| 22Rv1     | Sanger              | ACH-000956 |
| LNCaP     | GeCKO_19Q1 & Sanger | ACH-000977 |
| VCAP      | Avana_20Q1          | ACH-000115 |

**Supplementary Table 9: Outcome ARBS identified in primary prostate cancer patients**

Ratio of good versus poor outcome sites per patient and class stratification definition.

| Sample | GSM_number | good | poor | case_ctrl | gp_ratio | class |
|--------|------------|------|------|-----------|----------|-------|
| P223T  | GSM3409642 | 96   | 86   | case      | 1.116    | mix   |
| P227T  | GSM3409643 | 116  | 145  | case      | 0.800    | mix   |
| P228T  | GSM3409644 | 131  | 131  | control   | 1.000    | mix   |
| P229T  | GSM3409645 | 136  | 159  | case      | 0.855    | mix   |
| P230T  | GSM3409646 | 131  | 146  | case      | 0.897    | mix   |
| P249T  | GSM3409647 | 131  | 131  | control   | 1.000    | mix   |
| P252T  | GSM3409648 | 128  | 82   | control   | 1.561    | good  |
| P255T  | GSM3409650 | 129  | 180  | case      | 0.717    | poor  |
| P257T  | GSM3409651 | 88   | 104  | control   | 0.846    | mix   |
| P261T  | GSM3409652 | 91   | 130  | case      | 0.700    | poor  |
| P262T  | GSM3409653 | 116  | 104  | control   | 1.115    | mix   |
| P263T  | GSM3409654 | 95   | 78   | control   | 1.218    | good  |
| P265T  | GSM3409655 | 52   | 36   | case      | 1.444    | good  |
| P266T  | GSM3409656 | 133  | 185  | control   | 0.719    | poor  |
| P268T  | GSM3409657 | 106  | 170  | case      | 0.624    | poor  |
| P272T  | GSM3409658 | 87   | 59   | control   | 1.475    | good  |
| P274T  | GSM3409659 | 84   | 47   | case      | 1.787    | good  |
| P276T  | GSM3409660 | 101  | 161  | case      | 0.627    | poor  |
| P279T  | GSM3409661 | 78   | 41   | control   | 1.902    | good  |
| P280T  | GSM3409662 | 94   | 63   | control   | 1.492    | good  |
| P294T  | GSM3409664 | 111  | 119  | case      | 0.933    | mix   |
| P295T  | GSM3409665 | 14   | 4    | case      | 3.500    | good  |
| P297T  | GSM3409666 | 117  | 135  | control   | 0.867    | mix   |
| P298T  | GSM3409667 | 74   | 113  | case      | 0.655    | poor  |
| P300T  | GSM3409668 | 95   | 143  | control   | 0.664    | poor  |
| P301T  | GSM3409669 | 107  | 134  | case      | 0.799    | poor  |
| P305T  | GSM3409670 | 122  | 135  | control   | 0.904    | mix   |
| P309T  | GSM3409671 | 33   | 45   | case      | 0.733    | poor  |
| P310T  | GSM3409672 | 134  | 178  | case      | 0.753    | poor  |
| P313T  | GSM3409673 | 113  | 156  | case      | 0.724    | poor  |
| P324T  | GSM3409674 | 126  | 152  | control   | 0.829    | mix   |
| P327T  | GSM3409675 | 7    | 1    | case      | 7.000    | good  |
| P328T  | GSM3409676 | 81   | 53   | control   | 1.528    | good  |
| P336T  | GSM3409677 | 69   | 63   | control   | 1.095    | mix   |
| P342T  | GSM3409678 | 67   | 95   | control   | 0.705    | poor  |
| P343T  | GSM3409679 | 134  | 188  | case      | 0.713    | poor  |

|       |            |     |     |         |       |      |
|-------|------------|-----|-----|---------|-------|------|
| P348T | GSM3409680 | 51  | 21  | case    | 2.429 | good |
| P352T | GSM3409682 | 130 | 176 | case    | 0.739 | poor |
| P355T | GSM3409683 | 59  | 22  | case    | 2.682 | good |
| P416T | GSM3409684 | 126 | 157 | control | 0.803 | mix  |
| P426T | GSM3409685 | 111 | 161 | case    | 0.689 | poor |
| P427T | GSM3409686 | 127 | 186 | control | 0.683 | poor |
| P431T | GSM3409687 | 78  | 106 | case    | 0.736 | poor |
| P433T | GSM3409688 | 8   | 3   | control | 2.667 | good |
| P444T | GSM3409689 | 17  | 6   | control | 2.833 | good |
| P449T | GSM3409690 | 71  | 91  | case    | 0.780 | poor |
| P450T | GSM3409691 | 75  | 64  | case    | 1.172 | mix  |
| P452T | GSM3409692 | 50  | 9   | case    | 5.556 | good |
| P456T | GSM3409693 | 102 | 161 | control | 0.634 | poor |
| P462T | GSM3409694 | 129 | 167 | case    | 0.772 | poor |
| P464T | GSM3409695 | 87  | 113 | case    | 0.770 | poor |
| P466T | GSM3409696 | 57  | 45  | control | 1.267 | good |
| P475T | GSM3409697 | 17  | 5   | control | 3.400 | good |
| P500T | GSM3409698 | 94  | 137 | case    | 0.686 | poor |
| P506T | GSM3409699 | 55  | 51  | case    | 1.078 | mix  |
| P507T | GSM3409700 | 130 | 176 | control | 0.739 | poor |
| P509T | GSM3409701 | 130 | 160 | control | 0.813 | mix  |
| P511T | GSM3409702 | 76  | 96  | control | 0.792 | poor |
| P513T | GSM3409703 | 97  | 104 | control | 0.933 | mix  |
| P527T | GSM3409704 | 116 | 151 | case    | 0.768 | poor |
| P531T | GSM3409705 | 60  | 30  | case    | 2.000 | good |
| P533T | GSM3409706 | 25  | 64  | control | 0.391 | poor |
| P534T | GSM3409707 | 97  | 131 | control | 0.740 | poor |
| P536T | GSM3409708 | 124 | 172 | case    | 0.721 | poor |
| P540T | GSM3409709 | 133 | 134 | control | 0.993 | mix  |
| P544T | GSM3409710 | 31  | 29  | control | 1.069 | mix  |
| P552T | GSM3409711 | 121 | 179 | case    | 0.676 | poor |
| P555T | GSM3409712 | 23  | 8   | control | 2.875 | good |
| P559T | GSM3409713 | 45  | 34  | case    | 1.324 | good |
| P560T | GSM3409714 | 29  | 45  | control | 0.644 | poor |
| P593T | GSM3409715 | 60  | 58  | control | 1.034 | mix  |
| P603T | GSM3409716 | 41  | 29  | control | 1.414 | good |
| P618T | GSM3409717 | 131 | 176 | case    | 0.744 | poor |
| P643T | GSM3409718 | 66  | 84  | case    | 0.786 | poor |
| P674T | GSM3409719 | 119 | 177 | control | 0.672 | poor |
| P680T | GSM3409720 | 58  | 139 | control | 0.417 | poor |
| P695T | GSM3409721 | 106 | 169 | control | 0.627 | poor |

|       |            |    |     |         |       |      |
|-------|------------|----|-----|---------|-------|------|
| P710T | GSM3409722 | 26 | 86  | case    | 0.302 | poor |
| P717T | GSM3409723 | 22 | 28  | case    | 0.786 | poor |
| P730T | GSM3409724 | 48 | 58  | case    | 0.828 | mix  |
| P737T | GSM3409725 | 53 | 77  | case    | 0.688 | poor |
| P747T | GSM3409726 | 60 | 66  | control | 0.909 | mix  |
| P779T | GSM3409727 | 10 | 11  | control | 0.909 | mix  |
| P811T | GSM3409728 | 75 | 120 | case    | 0.625 | poor |
| P832T | GSM3409729 | 52 | 98  | control | 0.531 | poor |
