# Supplementary material for: Extensive androgen receptor enhancer heterogeneity in primary prostate cancers underlies transcriptional diversity and metastatic potential
Source: PubMed Central journal article supplement (PMC9712620; doi:10.1038/s41467-022-35135-2), 2022-11-30
Supplement: 41467_2022_35135_MOESM3_ESM.pdf [file 41467_2022_35135_MOESM3_ESM.pdf]

## **Description of Additional Supplementary Files**

File Name: Supplementary Data 1

Description: Overview of oligonucleotides used in study
